# Supplementary material for: 5-hydroxymethylcytosine Marks Mammalian Origins Acting as a Barrier to Replication
Source: PubMed Central journal article supplement (PMC6667497; doi:10.1038/s41598-019-47528-3), 2019-07-30
Supplement: 41598_2019_47528_MOESM1_ESM.pdf [file 41598_2019_47528_MOESM1_ESM.pdf]

## Supplemental Information

### 5-hydroxymethylcytosine Marks Mammalian Origins Acting as a Barrier to Replication

Terezia Prikrylova<sup>1,#</sup>, Julia Robertson<sup>1,#</sup>, Francesca Ferrucci<sup>1</sup>, Dorota Konorska<sup>1</sup>, Håvard Aanes<sup>1</sup>, Adeel Manaf<sup>1</sup>, Beibei Zhang<sup>2</sup>, Cathrine Broberg Vågbø<sup>3</sup>, Anna Kuśnierczyk<sup>3</sup>, Karin M. Gilljam<sup>1,3</sup>, Caroline Løvkvam-Køster<sup>1</sup>, Marit Otterlei<sup>1,3</sup>, John Arne Dahl<sup>1</sup>, Jorrit Enserink<sup>4,5,6</sup>, Arne Klungland<sup>1,7</sup> and Adam B. Robertson<sup>1,\*</sup>

#### Index

Supplemental Figures (S1-S16)

Supplemental Figure Legends

Supplemental Gels (Full images of cropped gels found in the Figures)

Supplemental Tables (S1-S7)

# Supplemental Figure S1

Streptavidin Coated  
Magnetic Beads

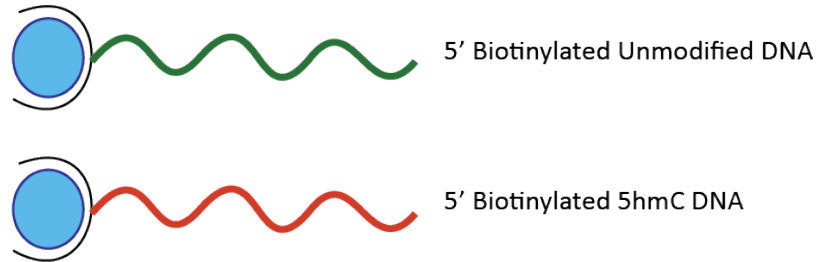

+ HeLa Nuclear Extract

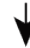

Isolate DNA and bound Proteins

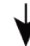

Size select on SDS-PAGE

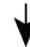

Mass Spectrometry

# Supplemental Figure S2

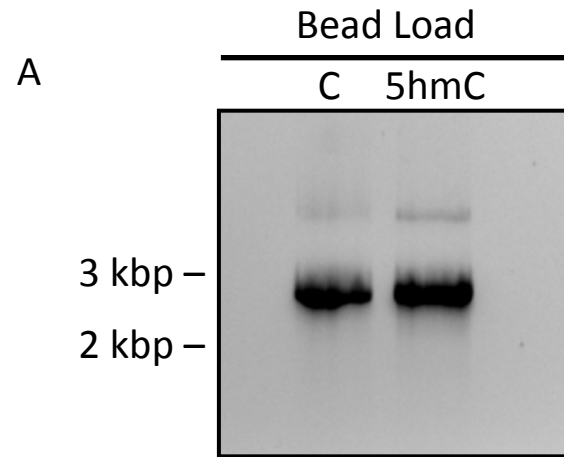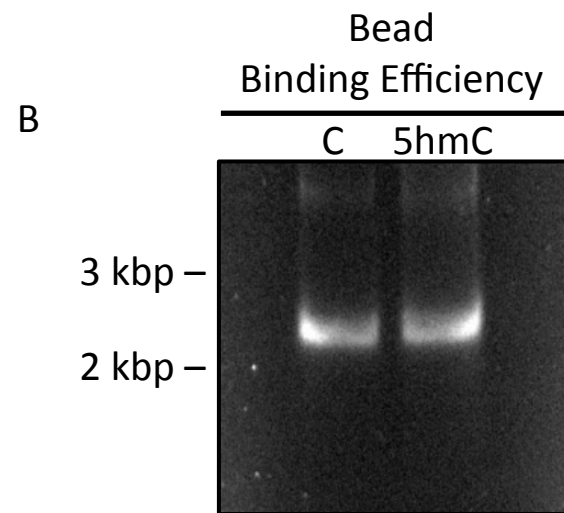

# Supplemental Figure S3

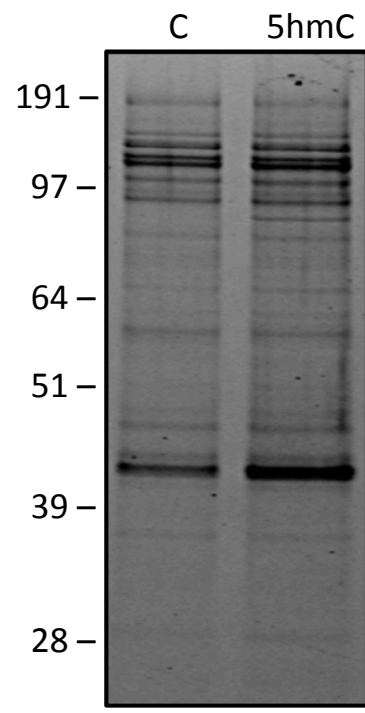

# Supplemental Figure S4

## Unmodified DNA

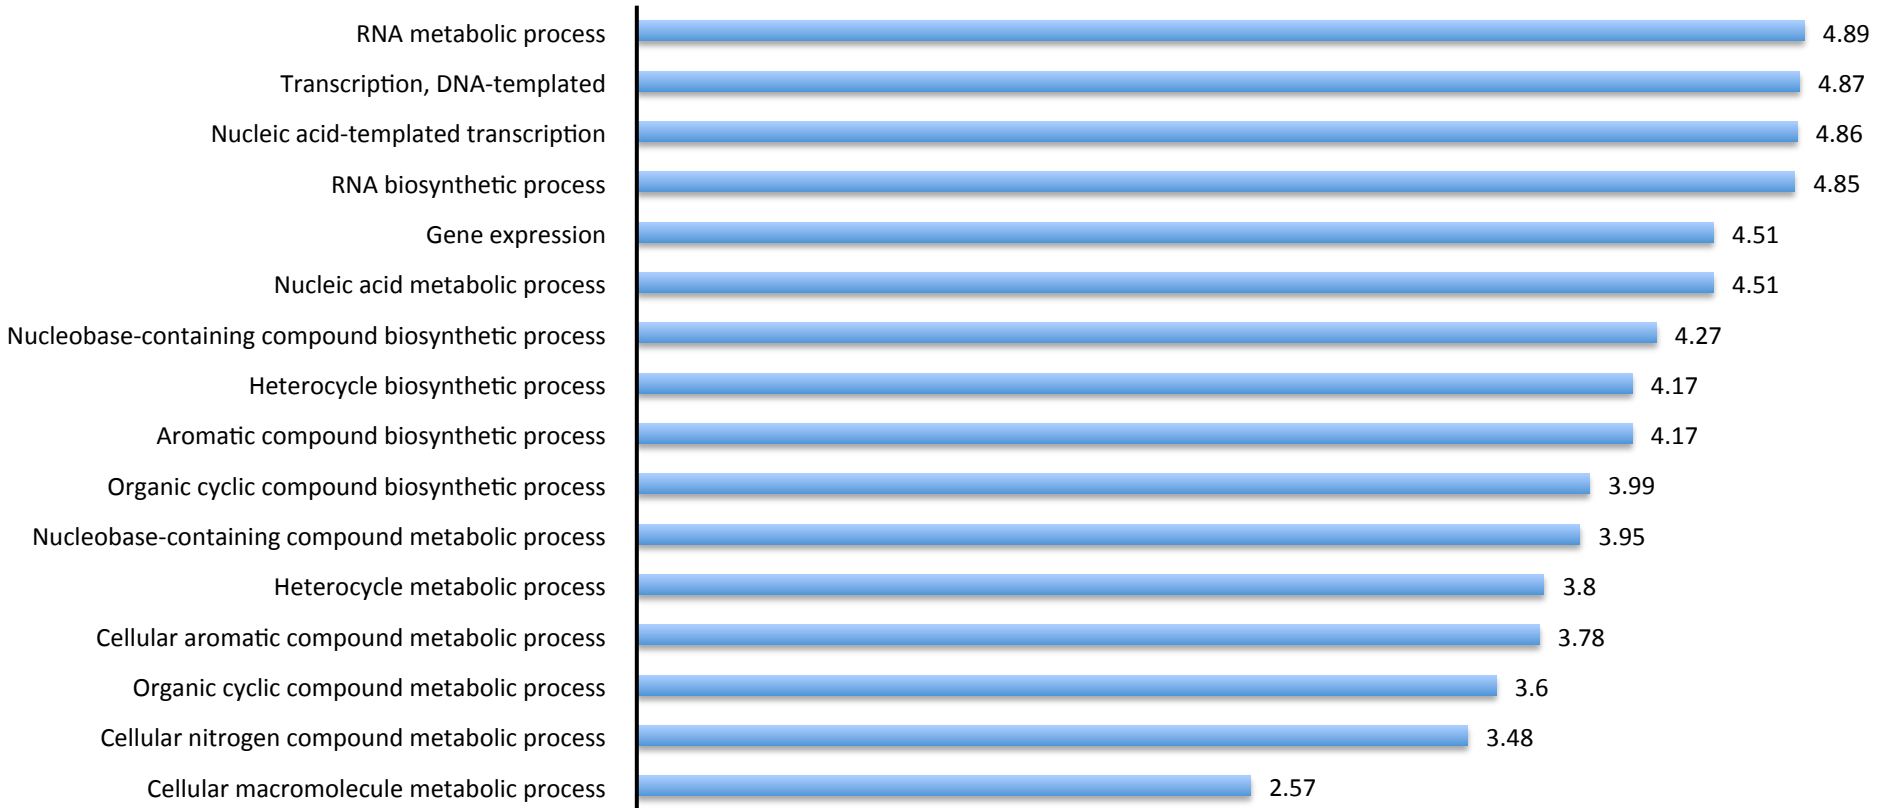

# Supplemental Figure S5

## Unmodified and 5hmC-modified DNA

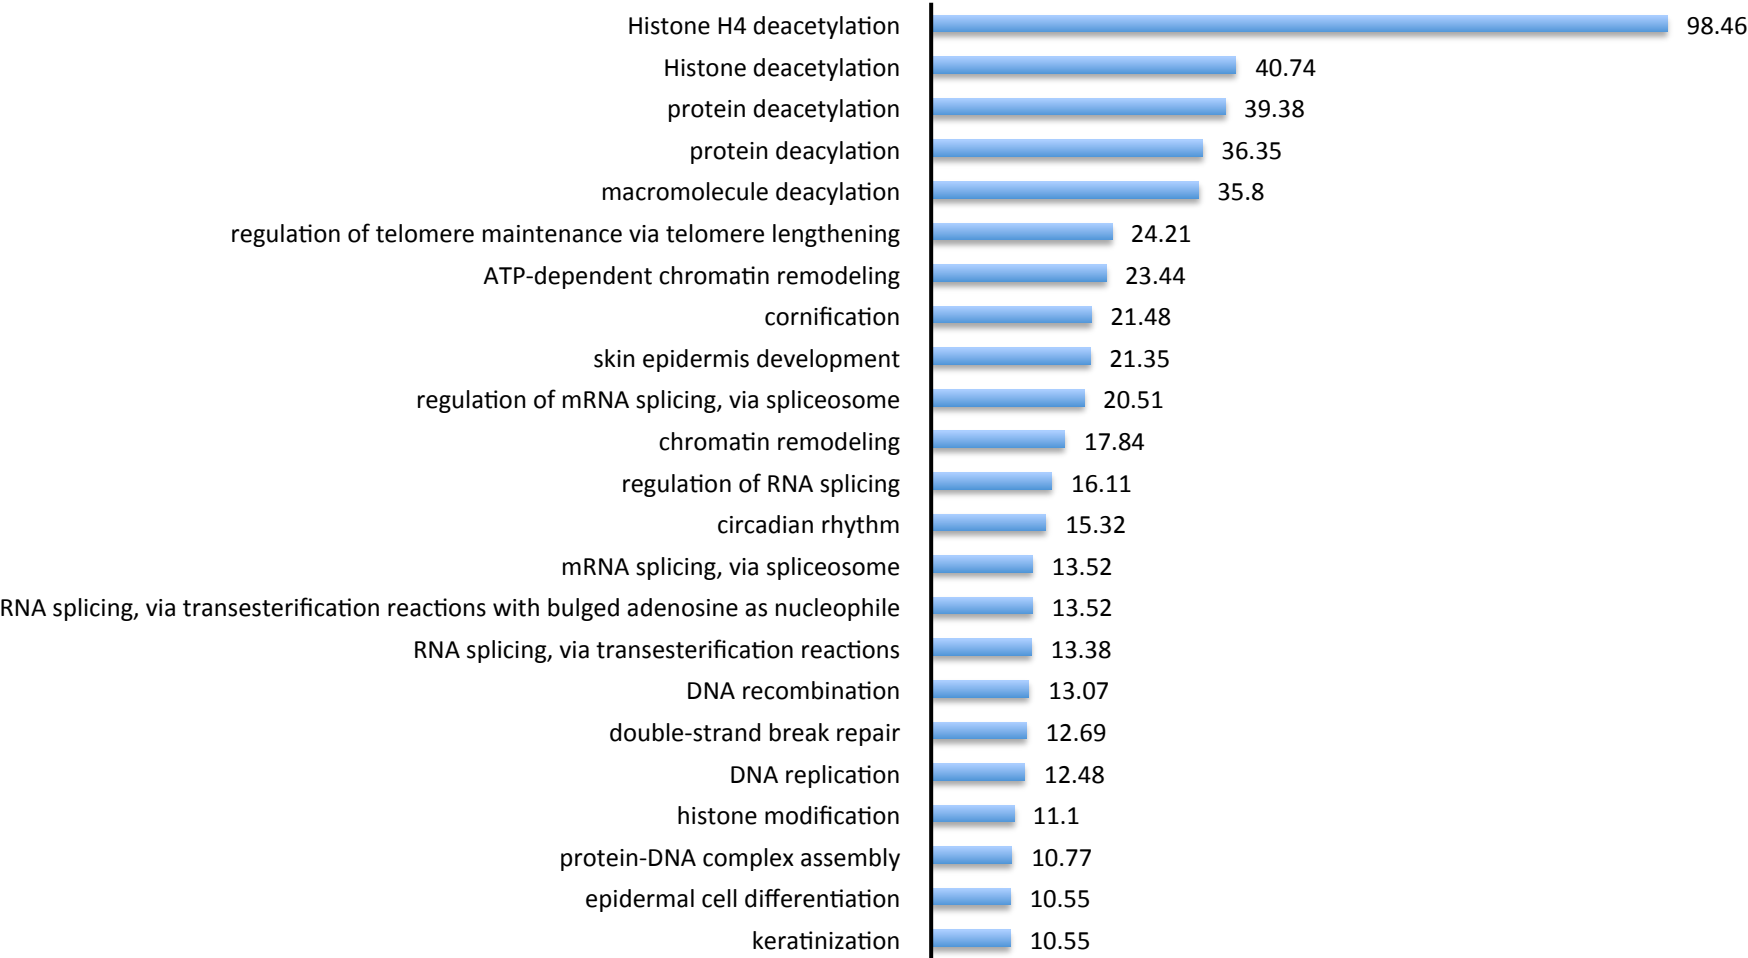

# Supplemental Figure S6

A

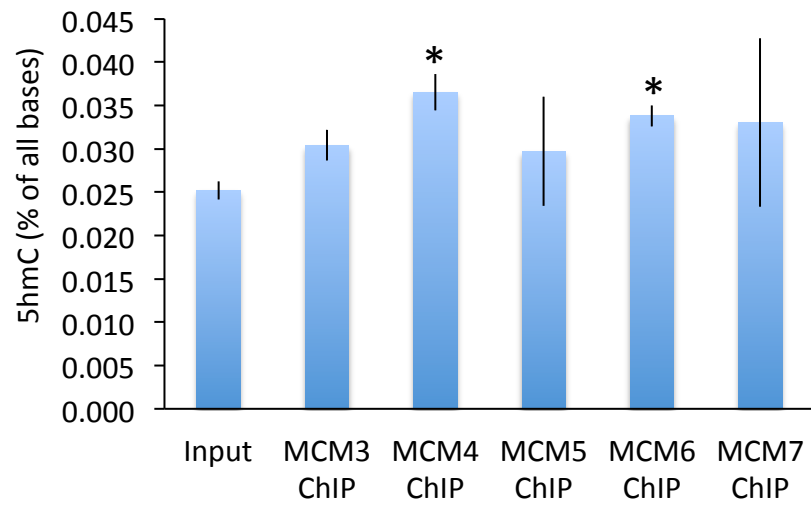

B

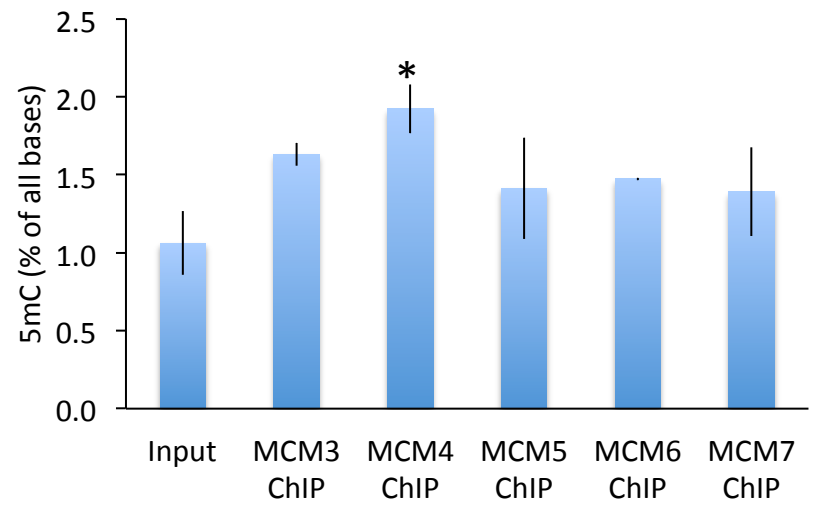

Supplemental Figure S7

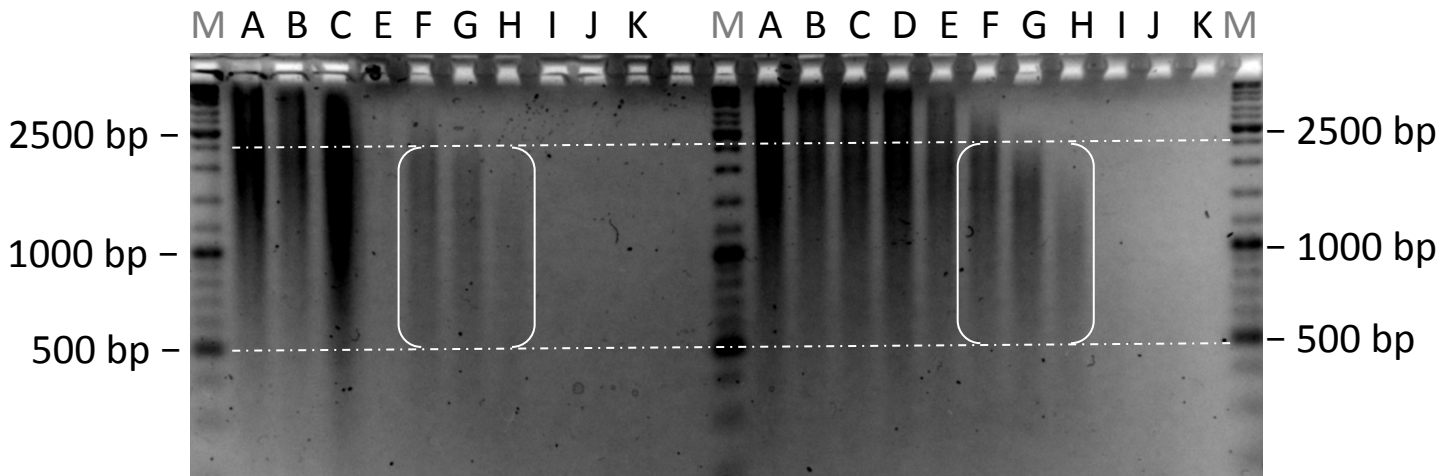



A

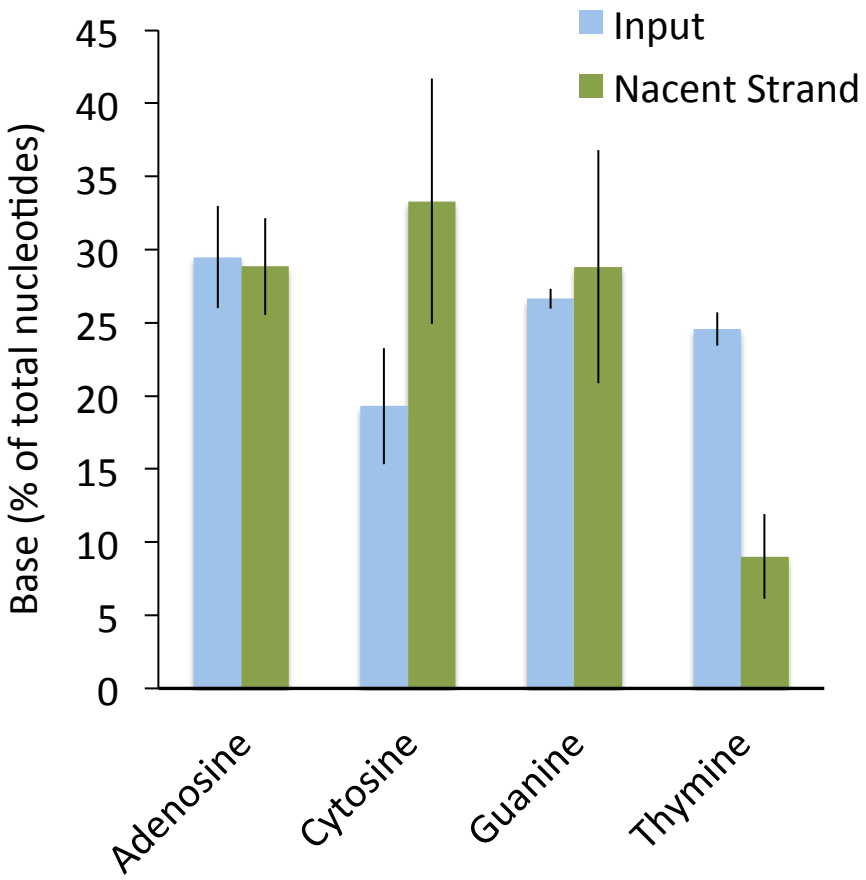

B

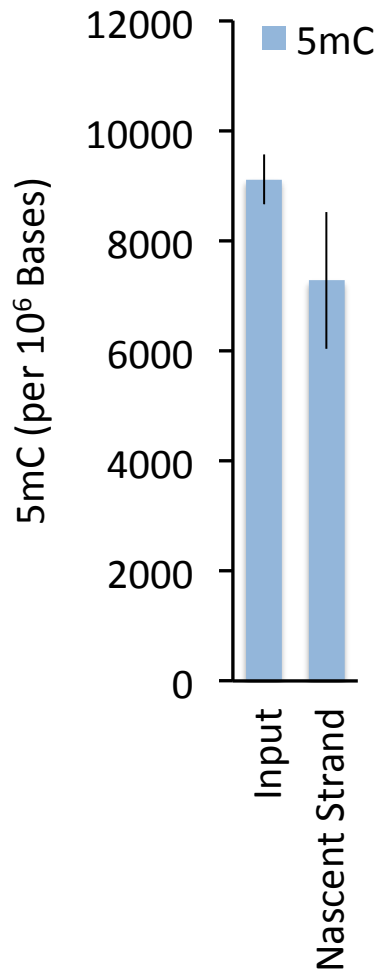

C

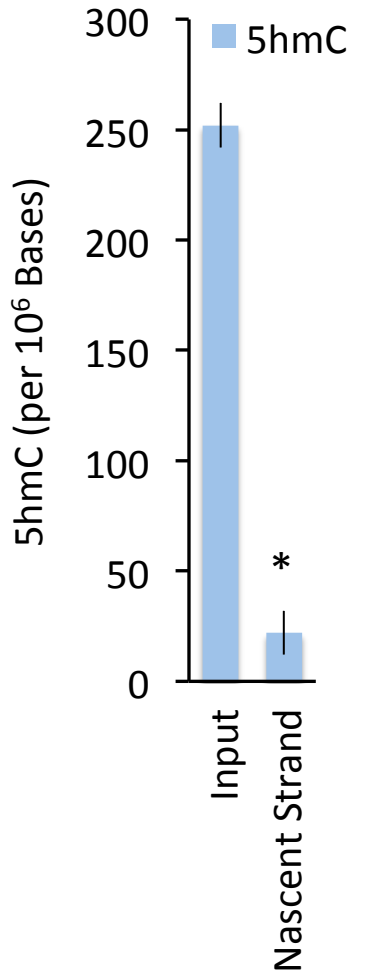

A

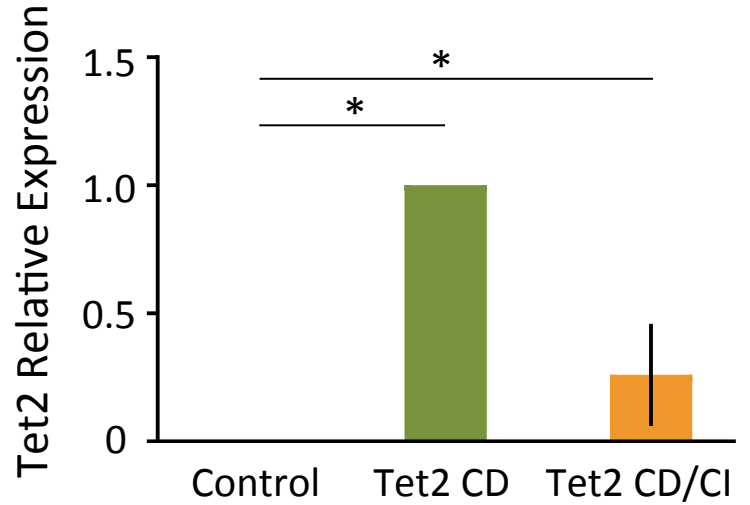

B

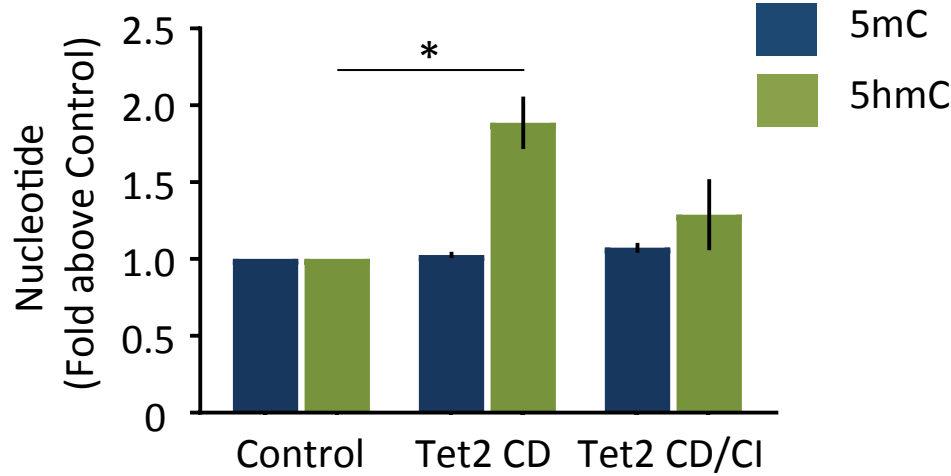

Supplemental Figure S10

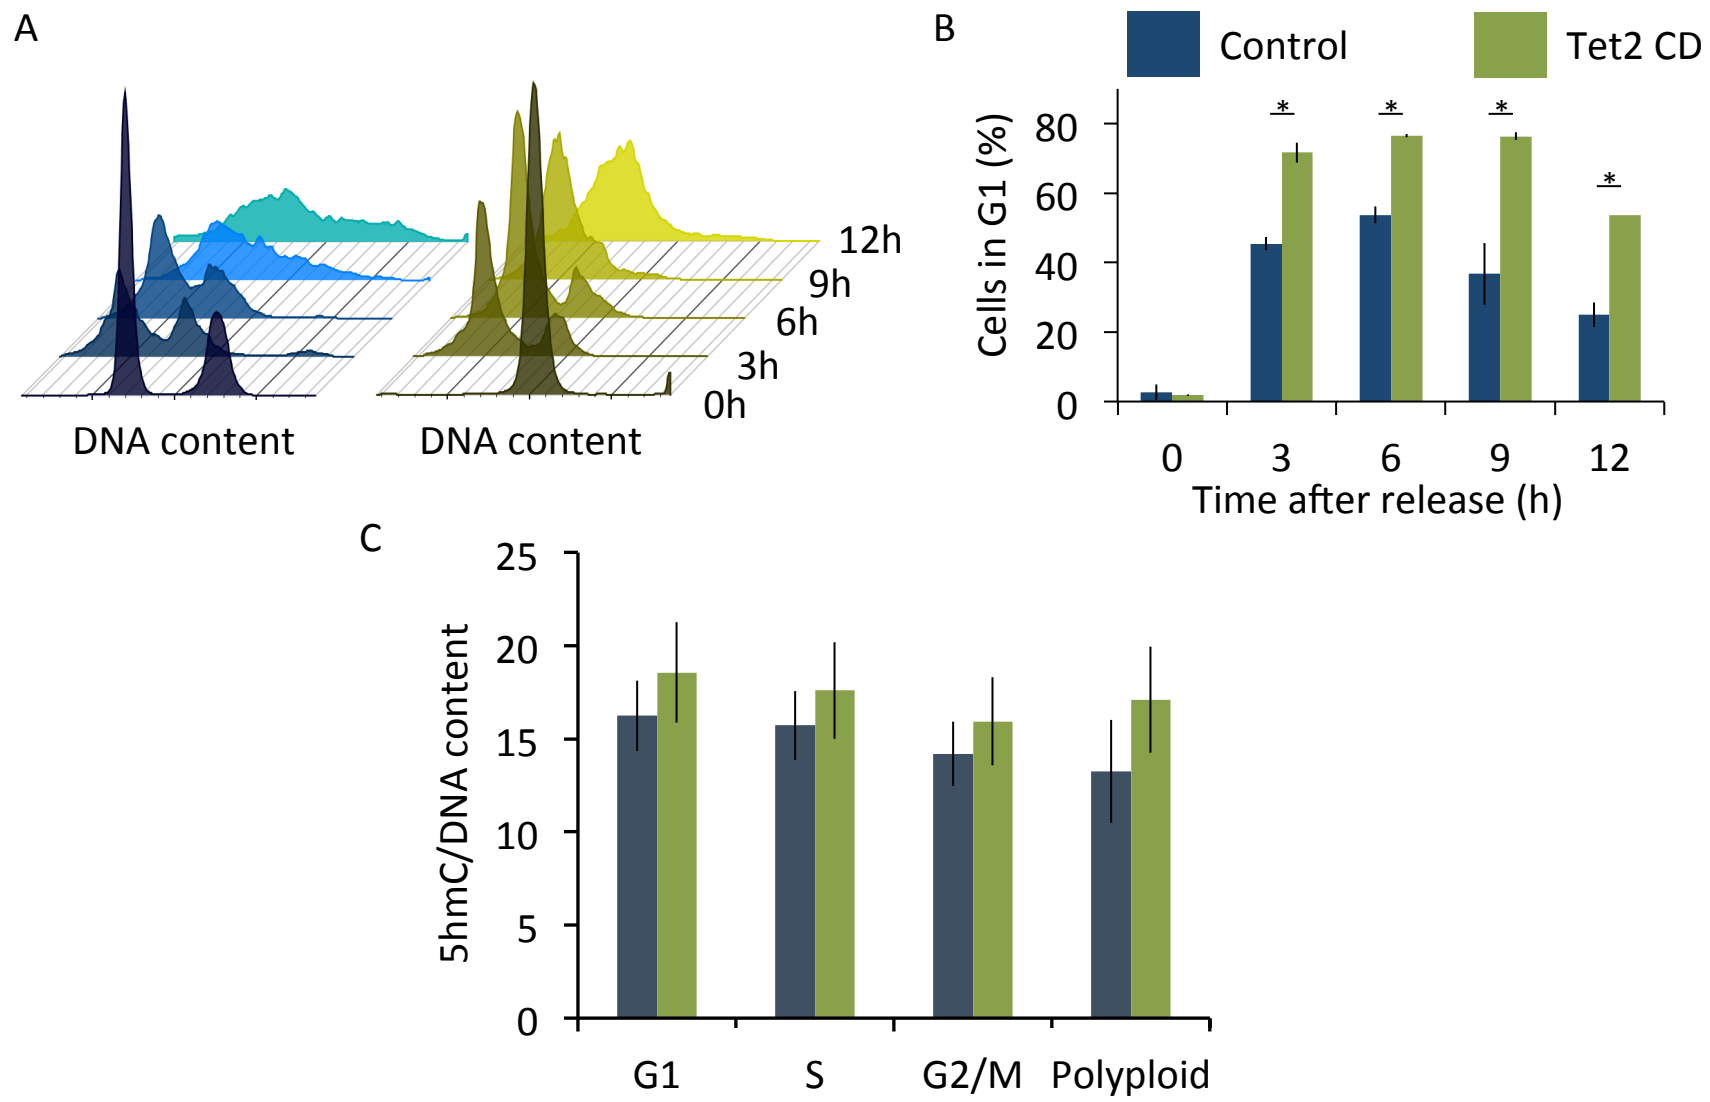

# Supplemental Figure S11

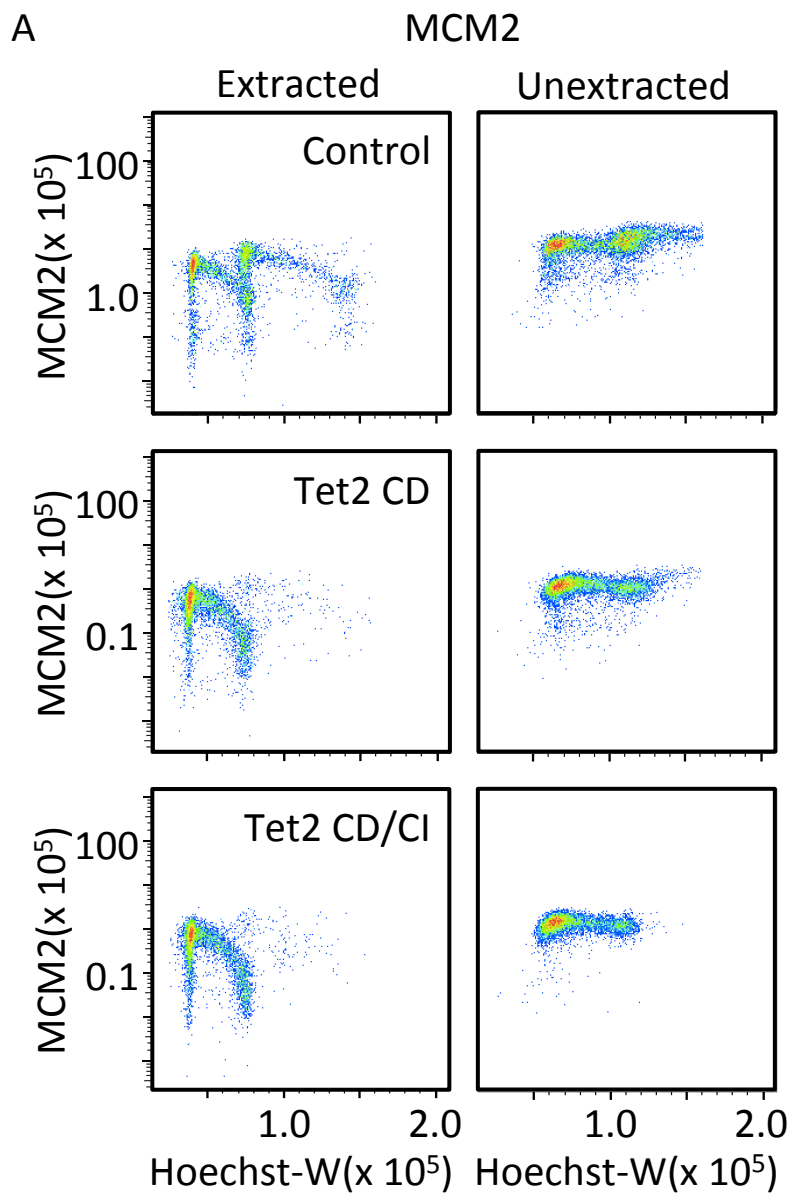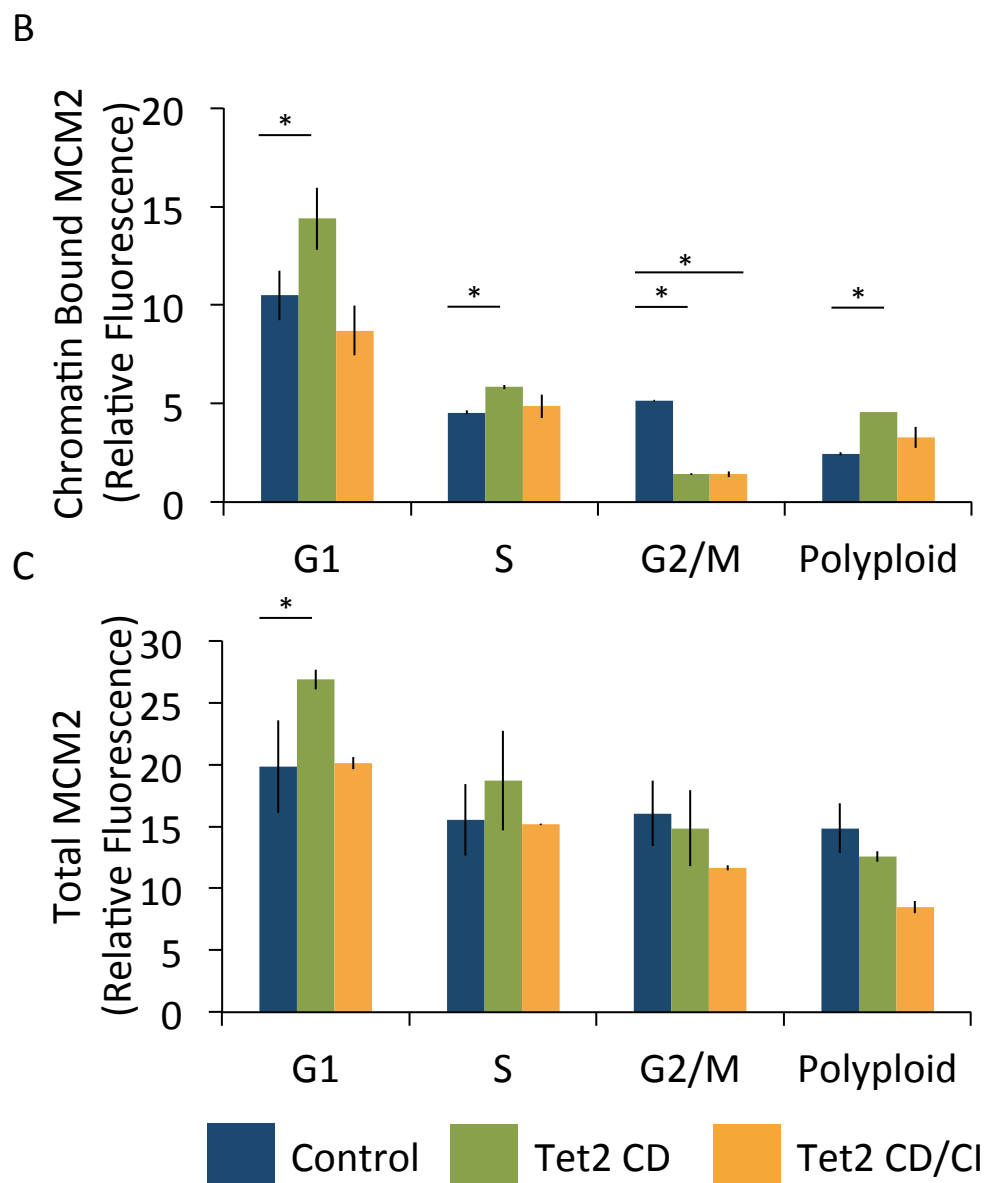

Supplemental Figure S12

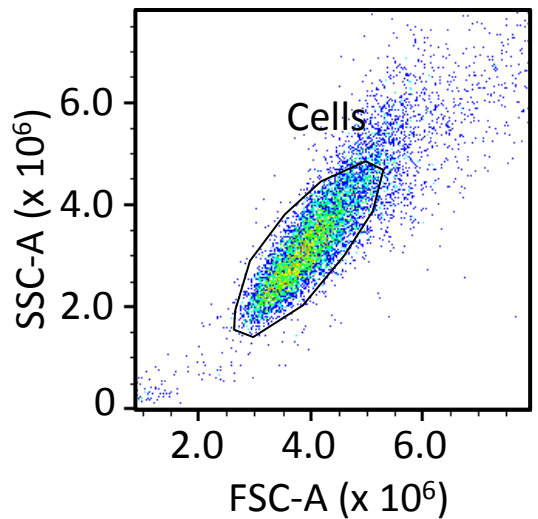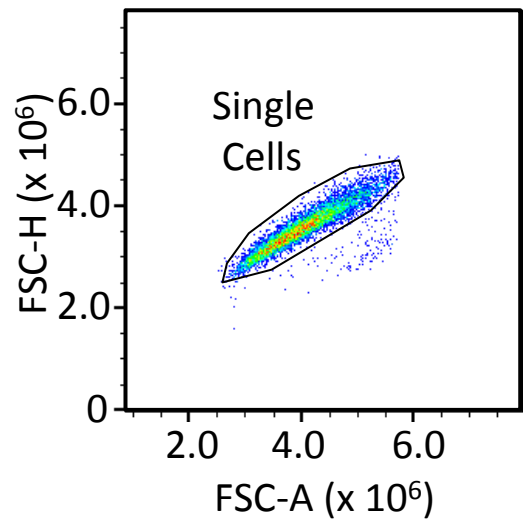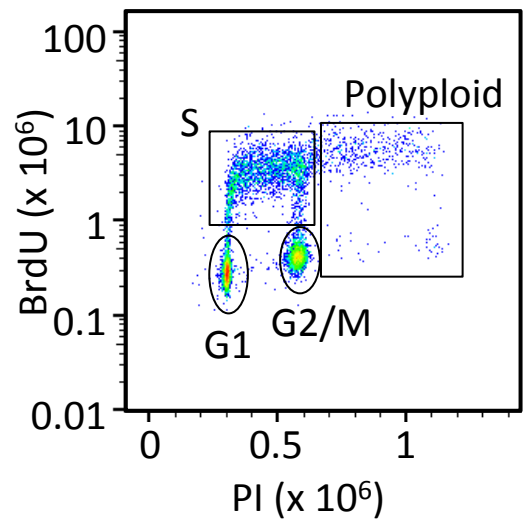

Supplemental Figure S13

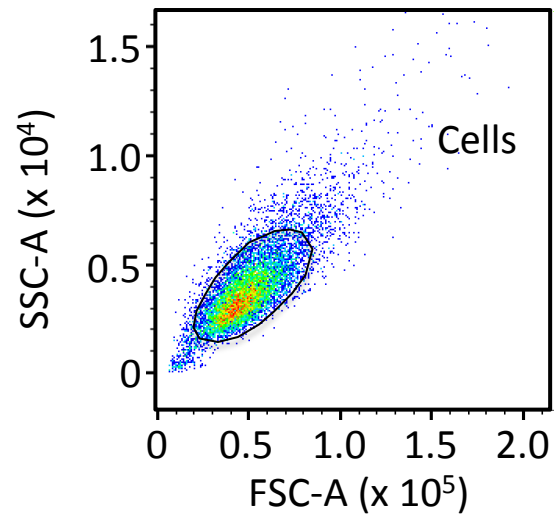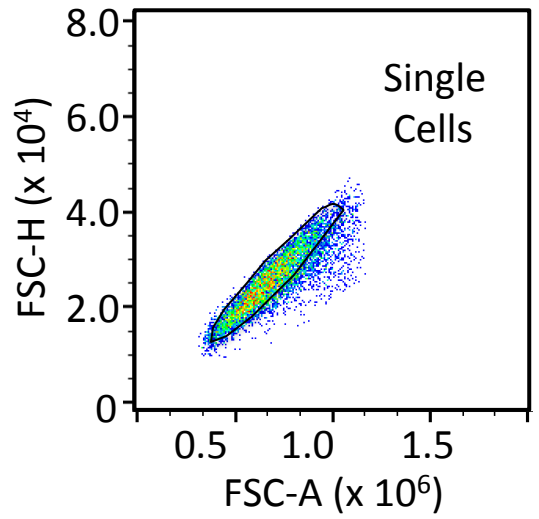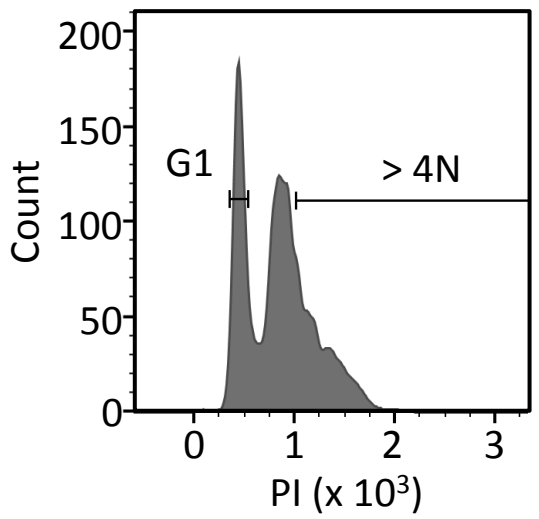

Supplemental Figure S14

A

Double thymidine block

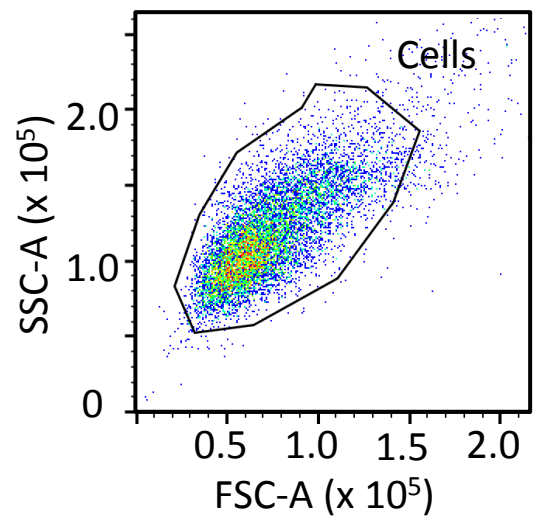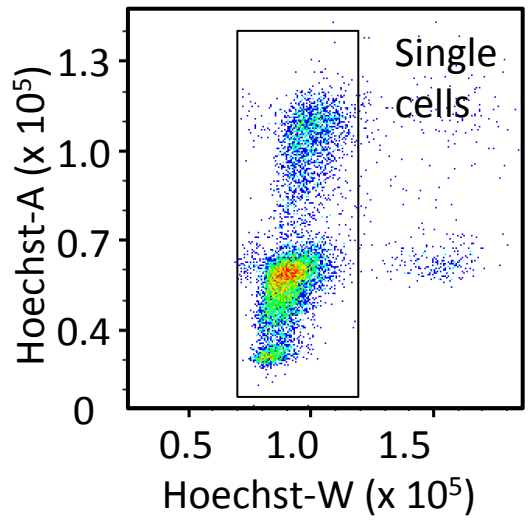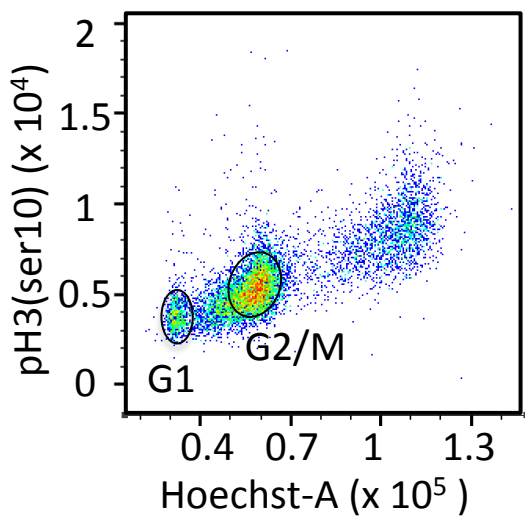

B

Nocodazole block

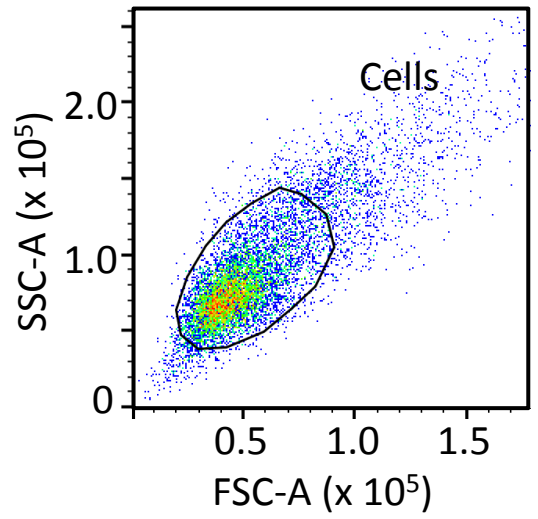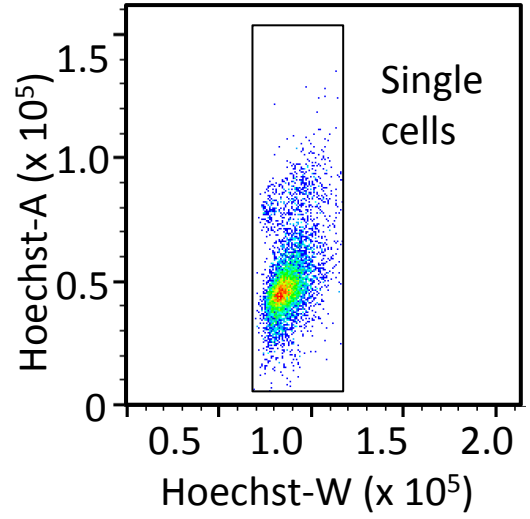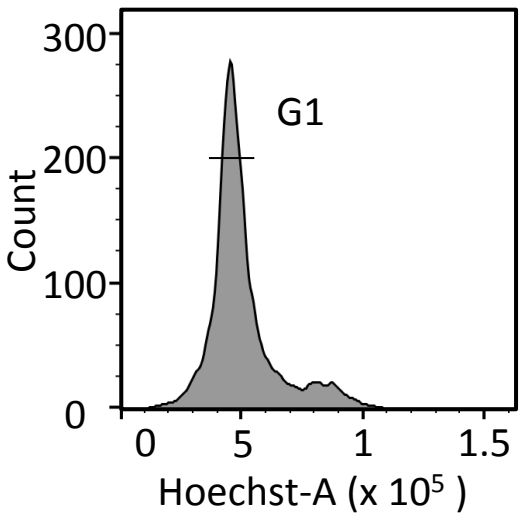

Supplemental Figure S15

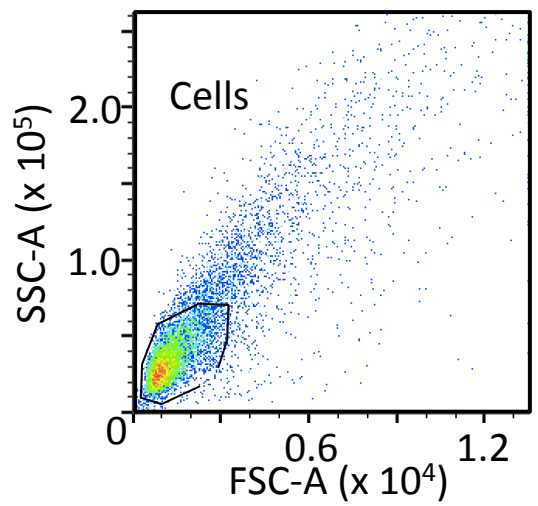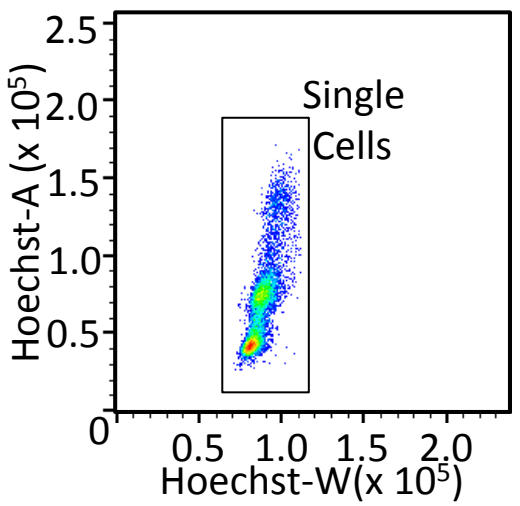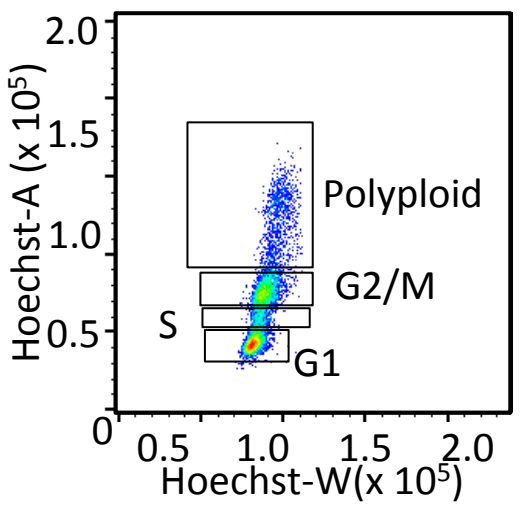



Supplemental Figure S16

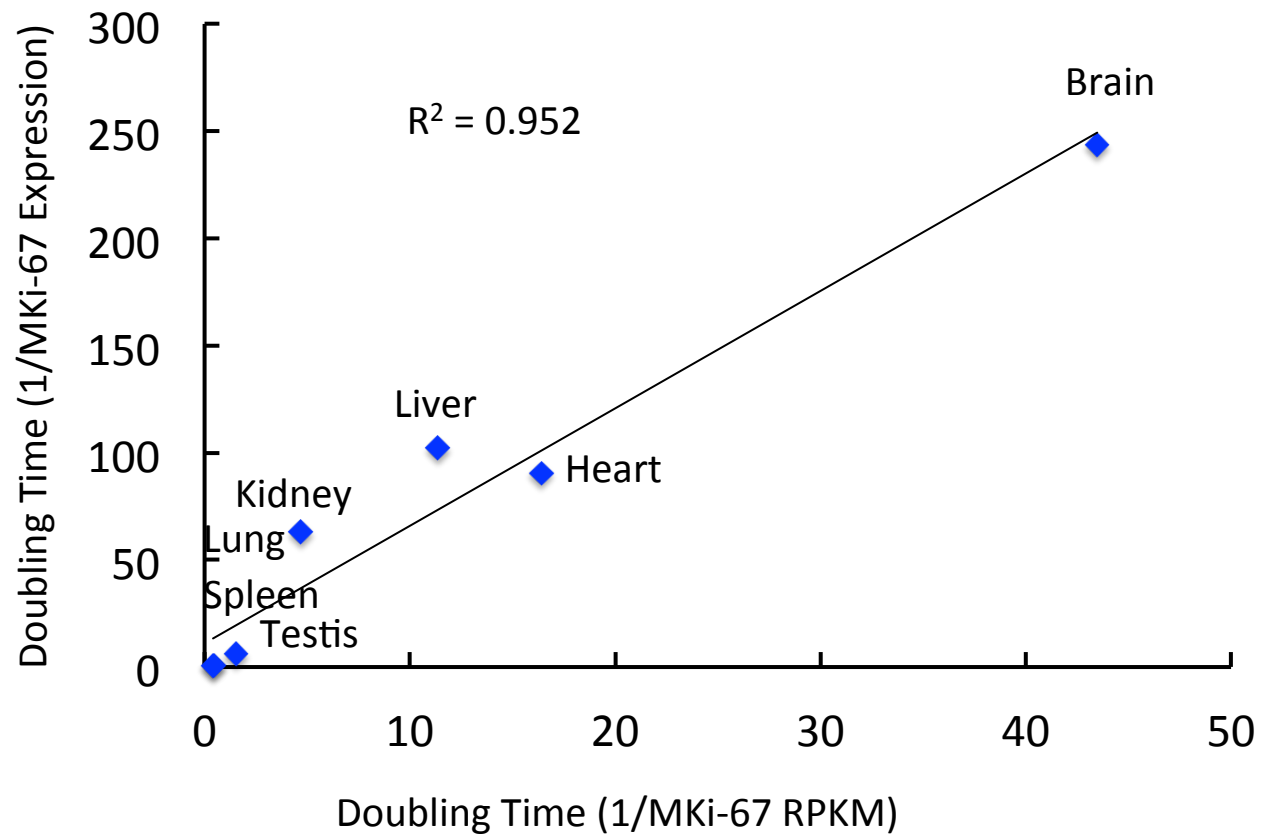

## **Supplemental Figure Legends**

**Supplemental Figure S1. 5hmC interaction experimental design.** Unmodified and 5hmC-modified, biotinylated substrates were incubated with HeLa nuclear extracts as described in the “Methods” section. Proteins binding each substrate were resolved using SDS-PAGE and identified using Electrospray and MALDI mass spectrometry.

**Supplemental Figure S2. Substrate loading and binding efficiencies are equivalent.** Unmodified and 5hmC-modified DNA substrates incubated with HeLa nuclear extracts, are **(A)** loaded on magnetic beads in equivalent portions and **(B)** are recovered with similar efficiencies.

**Supplemental Figure S3. Protein Identification.** Proteins that bind to each substrate were resolved using SDS-PAGE and identified by mass spectrometry.

**Supplemental Figure S4. Gene Ontology overrepresentation analysis of proteins that bind uniquely to unmodified DNA.** Proteins that interacted exclusively with unmodified DNA were subjected to a Panther Gene Ontology over-representation test. Results of the over-representation test are displayed as fold above expected for a random protein population.

**Supplemental Figure S5. Gene Ontology overrepresentation analysis of proteins that bind to both unmodified and 5hmC-modified DNA.** Proteins that interacted with both unmodified and 5hmC-modified DNA were subjected to a Panther Gene

Ontology over-representation test. Results of the over-representation test are displayed as fold above expected for a random protein population.

**Supplemental Figure S6.** 5hmC (A) and 5mC (B) content in MCM immunoprecipitated mESC chromatin. \* p-value < 0.05.

**Supplemental Figure S7. Alkaline gel of nascent strand isolation.** BrdU labeled DNA fractions from mESCs were loaded on 2% alkaline gel and fractions corresponding to 0.5–2.5 kb were pooled and used for BrdU immunoprecipitation.

**Supplemental Figure S8.** LC-MS/MS quantification of DNA bases (A) and DNA modifications 5mC (B) and 5hmC (C) in Input and Nascent strand of mESCs. \* p-value < 0.001.

**Supplemental Figure S9. Characterization of Stable HeLa Cell lines.** (A) Tet2 expression and (B) 5mC and 5hmC content in HeLa cell lines stably expressing YFP (Control), Tet2 CD fused to YFP (Tet2 CD), and Tet2 CD inactive mutant (Tet2 CD/CI). \* p-value < 0.05.

**Supplemental Figure S10. Cell cycle synchronization of HeLa cell lines stably expressing YFP (Control) and Tet2 CD fused to YFP (Tet2 CD).** Cells were synchronized in G2/M using double thymidine - nocodazole block and samples were analyzed at different time points after release (A). Percentage of cells in G1 phase

(%) after release (B). \* p-value < 0.05. (C) 5hmC levels throughout the cell cycle. 5hmC levels normalized to mean intensity of fluorescence of PI.

**Supplemental Figure S11. Flow cytometry analysis of MCM2 occupancy on DNA through cell cycle of HeLa cell lines stably expressing YFP (Control), Tet2 CD fused to YFP (Tet2 CD), and Tet2 CD inactive mutant (Tet2 CD/CI).** (A) Flow cytometric analysis of HeLa stable cell lines pre-extracted with salt and detergent before fixation (extracted) or fixed without pre-extraction (unextracted). Cells were stained with antibody against MCM2 and DNA-stain Hoechst. Density scatter plots are shown for MCM staining versus DNA content. (B) Relative fluorescence quantification of chromatin bound MCM2 normalized to mean intensity of fluorescence of PI (B) and total MCM2 normalized to mean intensity of fluorescence of PI (C) during cell cycle. \* p-value < 0.05.

**Supplemental Figure S12. Gating strategy for the flow cytometry analysis of HeLa cell cycle.** Living cells were gated on a forward scatter (FSC)/side scatter (SSC) plot. Further, doublets were discriminated by plotting FSC-A versus FSC-H. Identification of individual phases of cell cycle was performed by visualizing DNA content (PI) versus BrdU incorporation.

**Supplemental Figure S13. Gating strategy for the flow cytometry analysis of H1299 cell cycle.** Living cells were gated on a forward scatter (FSC)/side scatter (SSC) plot. Further, doublets were discriminated by plotting FSC-A versus FSC-H. Identification of individual phases of cell cycle was performed by visualizing DNA content (PI).

**Supplemental Figure S14.** (A) Gating strategy for the flow cytometry analysis of cell cycle progression after double thymidine block. Living cells were gated on a forward scatter (FSC)/side scatter (SSC) plot. Further, doublets were discriminated by plotting Hoechst-W versus Hoechst-A. Identification of G2/M phase was performed by visualizing DNA content (Hoechst33258) and Anti-phospho-Histone H3 (Ser10).

(B) Gating strategy for the flow cytometry analysis of cell cycle progression after nocodazole block. Living cells were gated on a forward scatter (FSC)/side scatter (SSC) plot. Further, doublets were discriminated by plotting Hoechst-W versus Hoechst-A. Identification of G1 phase was performed by visualizing DNA content (Hoechst33258).

**Supplemental Figure S15. Gating strategy for the flow cytometry analysis of MCM2 occupancy on DNA through cell cycle.** Living cells were gated on a forward scatter (FSC)/side scatter (SSC) plot. Further, doublets were discriminated by plotting Hoechst-W versus Hoechst-A. Identification of individual phases of cell cycle was performed by visualizing DNA content (Hoechst-A versus Hoechst-W).

**Supplemental Figure S16. Validation of MKi-67 expression levels.** MKi-67 RPKM were taken from the GTEx Portal. RNA isolated from mouse organs was converted to cDNA and MKi-67 was quantified using qPCR. The MKi-67 RPKM values were compared to the expression values from our mice. These data show that the mice in our facility have similar MKi-67 expression levels as mice used for the GTEx portal.

## Supplemental Table Legends

**Supplemental Table S1. Proteins that interact with unmodified and 5hmC-modified DNA under our assay conditions.** Proteins that interact with unmodified and 5hmC modified DNA substrates as identified by Electrospray and MALDI Mass spectrometry.

**Supplemental Table S2. Results of Panther Gene Ontology Over-representation Test for proteins that interact exclusively with unmodified DNA.** Proteins that exclusively bind unmodified DNA were ranked according to their gene ontology biological process.

**Supplemental Table S3. Results of Panther Gene Ontology Over-representation Test for proteins that interact with both unmodified and 5hmC-modified DNA.** Proteins that bind both unmodified and 5hmC-DNA were ranked according to their gene ontology biological process.

**Supplemental Table S4. Results of Panther Gene Ontology Over-representation Test for proteins that interact exclusively with 5hmC-modified DNA.** Proteins that exclusively bind 5hmC-DNA were ranked according to their gene ontology biological process.

**Supplemental Table S5. Cell cycle analysis table of HeLa cell lines stably expressing YFP (Control), Tet2 CD fused to YFP (Tet2 CD), and Tet2 CD inactive mutant (Tet2**

**CD/CI).** BrdU treated cells were stained with antibody against BrdU and PI for DNA content. First panel of the table describes the percentage mean value of cells in each cell cycle phase  $\pm$  standard deviation. Hours that cells spend in each cell cycle phase are shown in second panel of the table.

**Supplemental Table S6. DNA construct sequences.** Sequences of Tet2 CD:YFP and Tet2 CD/CI:YFP fusion protein constructs. These constructs were used to make the relevant stable HeLa cell lines.

**Supplemental Table S7. Substrate sequences.** Sequence of unmodified and 5hmC-modified substrates used in this study.

Appendix I – Figure 2 Gel Images

MCM2

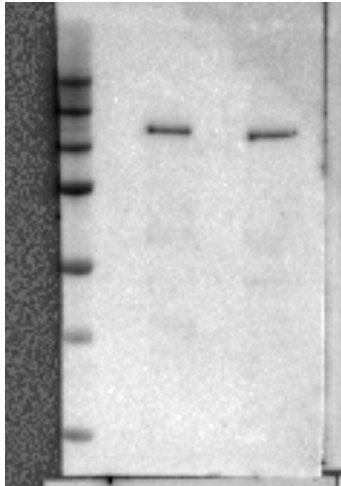

MCM3

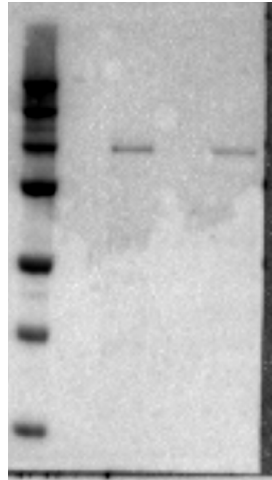

MCM4

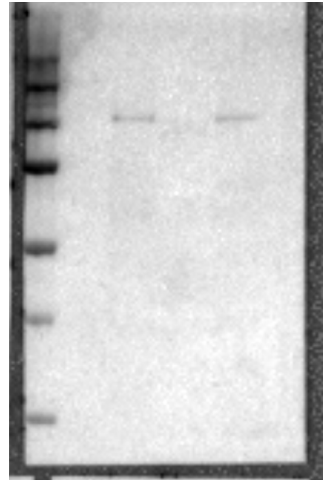

MSH2

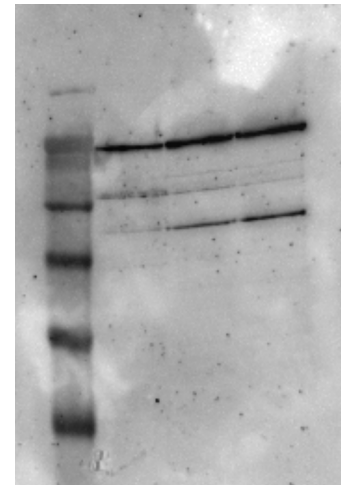

MCM5

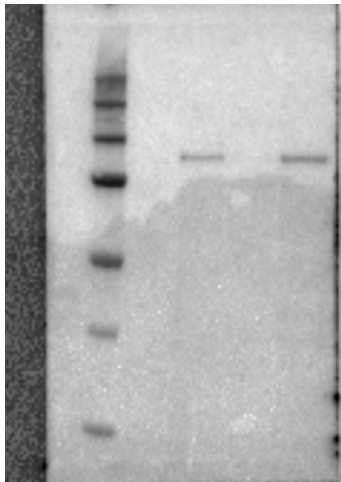

MCM6

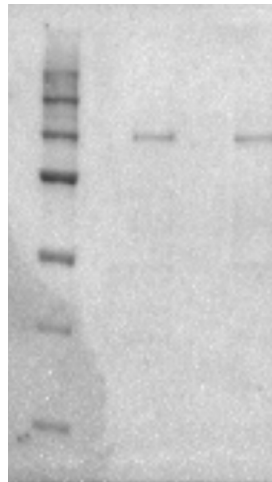

MCM7

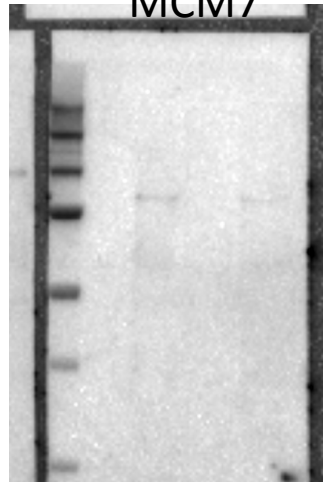



# Appendix II – Figure 3 Gel Images

p15  
INK4b ab 53034

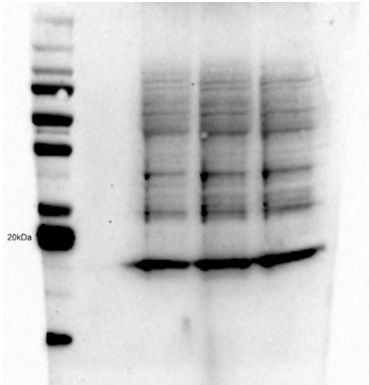

P16  
INK4a ab108349

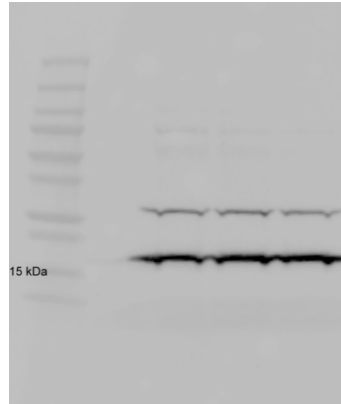

P18  
INK4c EPR1591

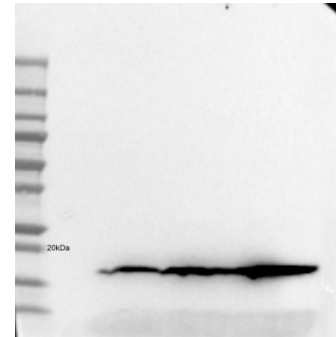

P19  
INKd ab102842

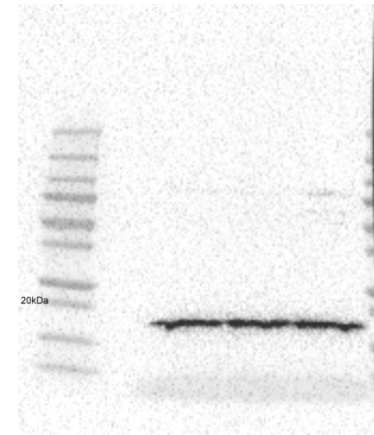

P21  
ab188224

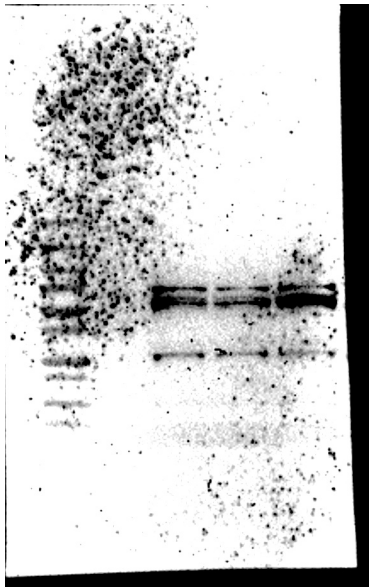

P 27

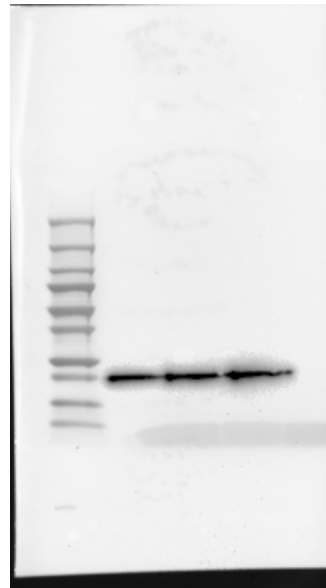

P53  
#9282S

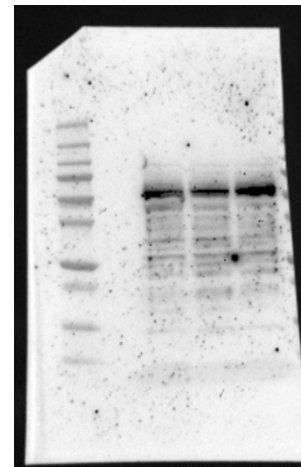

GAPDH

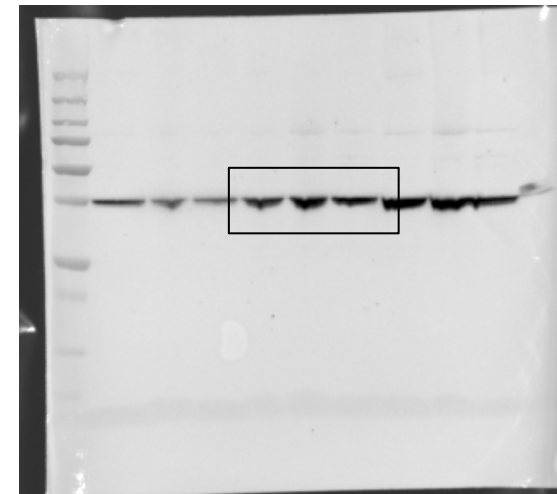

Duplicates Filtered from each List

Appears in Both Lists = RED

| Unmodified Binding Proteins | ShmC Binding Proteins | Unmod Only  | Unmodified and ShmC Modified | ShmC Only   |
|-----------------------------|-----------------------|-------------|------------------------------|-------------|
| SFPQ_HUMAN                  | SFPQ_HUMAN            | ELOA1_HUMAN | SFPQ_HUMAN                   | TOX4_HUMAN  |
| K2C1_HUMAN                  | K186_HUMAN            | HNR12_HUMAN | K2C1_HUMAN                   | KIF2C_HUMAN |
| TOP1_HUMAN                  | IF16_HUMAN            | ATF7_HUMAN  | TOP1_HUMAN                   | CUL4A_HUMAN |
| DYN2_HUMAN                  | TOP1_HUMAN            | NFIC_HUMAN  | DYN2_HUMAN                   | KIF2A_HUMAN |
| PARP1_HUMAN                 | PARP1_HUMAN           | NR2C2_HUMAN | PARP1_HUMAN                  | SYQ_HUMAN   |
| IF16_HUMAN                  | DYN2_HUMAN            | ARFG2_HUMAN | IF16_HUMAN                   | HS90A_HUMAN |
| K1C10_HUMAN                 | K2C1_HUMAN            | MUTYH_HUMAN | K1C10_HUMAN                  | FUBP2_HUMAN |
| HNRPU_HUMAN                 | UHRF1_HUMAN           | NRF1_HUMAN  | HNRPU_HUMAN                  | PF21A_HUMAN |
| K22E_HUMAN                  | K22E_HUMAN            | TYY1_HUMAN  | K22E_HUMAN                   | FOXK1_HUMAN |
| UHRF1_HUMAN                 | K1C10_HUMAN           | HMBX1_HUMAN | UHRF1_HUMAN                  | TSR1_HUMAN  |
| LSO1_HUMAN                  | TOX4_HUMAN            | PLRG1_HUMAN | LSO1_HUMAN                   | AOF1_HUMAN  |
| K2C5_HUMAN                  | CDC5L_HUMAN           | INT12_HUMAN | K2C5_HUMAN                   | KU70_HUMAN  |
| SYMC_HUMAN                  | UBF1_HUMAN            | IMA2_HUMAN  | SYMC_HUMAN                   | TERA_HUMAN  |
| UBF1_HUMAN                  | HNRPU_HUMAN           | TE2IP_HUMAN | UBF1_HUMAN                   | ERCC3_HUMAN |
| DNL3_HUMAN                  | LSO1_HUMAN            | AP2A_HUMAN  | DNL3_HUMAN                   | IMB1_HUMAN  |
| K186_HUMAN                  | SYMC_HUMAN            | TAD3L_HUMAN | K186_HUMAN                   | PO2F1_HUMAN |
| K1C9_HUMAN                  | KIF2C_HUMAN           | SFR56_HUMAN | K1C9_HUMAN                   | GTf2I_HUMAN |
| ELOA1_HUMAN                 | CUL4A_HUMAN           | RING1_HUMAN | EMAL3_HUMAN                  | RAD21_HUMAN |
| EMAL3_HUMAN                 | DNL3_HUMAN            | VIME_HUMAN  | EF1A1_HUMAN                  | GCNL2_HUMAN |
| EF1A1_HUMAN                 | KIF2A_HUMAN           | DDX47_HUMAN | PRKDC_HUMAN                  | XRCC1_HUMAN |
| PRKDC_HUMAN                 | SYQ_HUMAN             | NSUN5_HUMAN | CDC5L_HUMAN                  | MCM3_HUMAN  |
| CDC5L_HUMAN                 | K1C9_HUMAN            | RPC4_HUMAN  | K1C14_HUMAN                  | IFNA1_HUMAN |
| HNR12_HUMAN                 | HS90A_HUMAN           | DDX49_HUMAN | NEUA_HUMAN                   | LMNB2_HUMAN |
| K1C14_HUMAN                 | EMAL3_HUMAN           |             | ALBU_HUMAN                   | KIFC1_HUMAN |
| NEUA_HUMAN                  | FUBP2_HUMAN           |             | NSH2_HUMAN                   | MEMO1_HUMAN |
| ALBU_HUMAN                  | EF1A1_HUMAN           |             | NONO_HUMAN                   | WIZ_HUMAN   |
| MSH2_HUMAN                  | PF21A_HUMAN           |             | PNKP_HUMAN                   | MRE11_HUMAN |
| NONO_HUMAN                  | FOXK1_HUMAN           |             | TERF2_HUMAN                  | HNR11_HUMAN |
| PNKP_HUMAN                  | TSR1_HUMAN            |             | IF2G_HUMAN                   | PP1RA_HUMAN |
| TERF2_HUMAN                 | AOF1_HUMAN            |             | TCF2P_HUMAN                  | K2CG6_HUMAN |
| ATF7_HUMAN                  | PRKDC_HUMAN           |             | PRP19_HUMAN                  | NPM3_HUMAN  |
| IF2G_HUMAN                  | KU70_HUMAN            |             | RCOR1_HUMAN                  | PIP_HUMAN   |
| TCF2P_HUMAN                 | TERA_HUMAN            |             | MEF2D_HUMAN                  | FILA2_HUMAN |
| PRP19_HUMAN                 | ERCC3_HUMAN           |             | PTBP1_HUMAN                  | TCPD_HUMAN  |
| RCOR1_HUMAN                 | IMB1_HUMAN            |             | NFIA_HUMAN                   | IGHA1_HUMAN |
| MEF2D_HUMAN                 | PO2F1_HUMAN           |             | HDAC1_HUMAN                  | RCC2_HUMAN  |
| PTBP1_HUMAN                 | GTf2I_HUMAN           |             | UBIP1_HUMAN                  | PHKG1_HUMAN |
| NFIA_HUMAN                  | RAD21_HUMAN           |             | NFIB_HUMAN                   | HBA_HUMAN   |
| HDAC1_HUMAN                 | GCNL2_HUMAN           |             | SYDC_HUMAN                   | K1C16_HUMAN |
| UBIP1_HUMAN                 | XRCC1_HUMAN           |             | DMAP1_HUMAN                  | HNRPD_HUMAN |
| NFIB_HUMAN                  | MSH2_HUMAN            |             | KLF5_HUMAN                   | DBB2_HUMAN  |
| SYDC_HUMAN                  | MCM3_HUMAN            |             | HNRPL_HUMAN                  | ERR1_HUMAN  |
| DMAP1_HUMAN                 | IFNA1_HUMAN           |             | KHDR1_HUMAN                  | IF4A3_HUMAN |
| NFIC_HUMAN                  | LMNB2_HUMAN           |             | TF3C5_HUMAN                  | RCC1_HUMAN  |
| K1F5_HUMAN                  | KIFC1_HUMAN           |             | RUVB2_HUMAN                  | LDB1_HUMAN  |
| HNRPL_HUMAN                 | MEMO1_HUMAN           |             | SUH_HUMAN                    | TBG1_HUMAN  |
| KHDR1_HUMAN                 | WIZ_HUMAN             |             | RBBP4_HUMAN                  | K1C18_HUMAN |
| TF3C5_HUMAN                 | MRE11_HUMAN           |             | U2AF2_HUMAN                  | PAX6_HUMAN  |
| RUVB2_HUMAN                 | HNR11_HUMAN           |             | NUSAP_HUMAN                  |             |
| SUH_HUMAN                   | PP1RA_HUMAN           |             | ST65G_HUMAN                  |             |
| RBBP4_HUMAN                 | NONO_HUMAN            |             | DKC1_HUMAN                   |             |
| NR2C2_HUMAN                 | SYDC_HUMAN            |             | NFIL3_HUMAN                  |             |
| U2AF2_HUMAN                 | HNRPK_HUMAN           |             | RFA1_HUMAN                   |             |
| NUSAP_HUMAN                 | IF2G_HUMAN            |             | EXOS9_HUMAN                  |             |
| ST65G_HUMAN                 | PNKP_HUMAN            |             | HDAC2_HUMAN                  |             |
| ARFG2_HUMAN                 | TERF2_HUMAN           |             | KZC9_HUMAN                   |             |
| DKC1_HUMAN                  | PRP19_HUMAN           |             | SYFA_HUMAN                   |             |
| NFIL3_HUMAN                 | K2CG6_HUMAN           |             | K2CG6_HUMAN                  |             |
| RFA1_HUMAN                  | K2C8_HUMAN            |             | HNRPK_HUMAN                  |             |
| MUTYH_HUMAN                 | PTBP1_HUMAN           |             | CAF1B_HUMAN                  |             |
| NRF1_HUMAN                  | K1C14_HUMAN           |             | RUVB1_HUMAN                  |             |
| TYY1_HUMAN                  | UBIP1_HUMAN           |             | HNRPR_HUMAN                  |             |
| EXOS9_HUMAN                 | HDAC2_HUMAN           |             | CPSF7_HUMAN                  |             |
| HDAC2_HUMAN                 | RCOR1_HUMAN           |             | DEK_HUMAN                    |             |
| K2C8_HUMAN                  | MEF2D_HUMAN           |             | DERPC_HUMAN                  |             |
| SYFA_HUMAN                  | K2C5_HUMAN            |             | NOLA_HUMAN                   |             |
| K2CG6_HUMAN                 | TCF2P_HUMAN           |             | TBL1X_HUMAN                  |             |
| HNRPK_HUMAN                 | NFIB_HUMAN            |             | TBA1A_HUMAN                  |             |
| CAF1B_HUMAN                 | SUH_HUMAN             |             | TBL1R_HUMAN                  |             |
| RUVB1_HUMAN                 | U2AF2_HUMAN           |             | SF3A3_HUMAN                  |             |
| HMBX1_HUMAN                 | CAF1B_HUMAN           |             | HNRH1_HUMAN                  |             |
| HNRPR_HUMAN                 | RBBP4_HUMAN           |             | TBB5_HUMAN                   |             |
| CPSF7_HUMAN                 | RUVB2_HUMAN           |             | TBB2C_HUMAN                  |             |
| DEK_HUMAN                   | NFIA_HUMAN            |             | RBBP7_HUMAN                  |             |
| PLRG1_HUMAN                 | TBL1X_HUMAN           |             | PAIRB_HUMAN                  |             |
| DERPC_HUMAN                 | ALBU_HUMAN            |             | PSIP1_HUMAN                  |             |
| INT12_HUMAN                 | NUSAP_HUMAN           |             | DDX39_HUMAN                  |             |
| NOLA_HUMAN                  | SYFA_HUMAN            |             |                              |             |
| TBL1X_HUMAN                 | KHDR1_HUMAN           |             |                              |             |
| TBA1A_HUMAN                 | HNRPL_HUMAN           |             |                              |             |
| TBL1R_HUMAN                 | RFA1_HUMAN            |             |                              |             |
| SF3A3_HUMAN                 | NOLA_HUMAN            |             |                              |             |
| IMA2_HUMAN                  | DMAP1_HUMAN           |             |                              |             |
| HNRH1_HUMAN                 | SF3A3_HUMAN           |             |                              |             |
| TBB5_HUMAN                  | HDAC1_HUMAN           |             |                              |             |
| TBB2C_HUMAN                 | NPM3_HUMAN            |             |                              |             |
| RBBP7_HUMAN                 | PIP_HUMAN             |             |                              |             |
| TE2IP_HUMAN                 | HNRPR_HUMAN           |             |                              |             |
| AP2A_HUMAN                  | FILA2_HUMAN           |             |                              |             |
| PAIRB_HUMAN                 | EXOS9_HUMAN           |             |                              |             |
| TAD3L_HUMAN                 | KLF5_HUMAN            |             |                              |             |
| SFR56_HUMAN                 | ST65G_HUMAN           |             |                              |             |
| RING1_HUMAN                 | RUVB1_HUMAN           |             |                              |             |
| VIME_HUMAN                  | TCPD_HUMAN            |             |                              |             |
| DDX47_HUMAN                 | NFIL3_HUMAN           |             |                              |             |
| NSUN5_HUMAN                 | IGHA1_HUMAN           |             |                              |             |
| RPC4_HUMAN                  | TBL1R_HUMAN           |             |                              |             |
| PSIP1_HUMAN                 | RCC2_HUMAN            |             |                              |             |
| DDX49_HUMAN                 | PHKG1_HUMAN           |             |                              |             |
| DDX39_HUMAN                 | TF3C5_HUMAN           |             |                              |             |
|                             | DKC1_HUMAN            |             |                              |             |
|                             | K2CG6_HUMAN           |             |                              |             |
|                             | CPSF7_HUMAN           |             |                              |             |
|                             | HNRH1_HUMAN           |             |                              |             |
|                             | DEK_HUMAN             |             |                              |             |
|                             | DERPC_HUMAN           |             |                              |             |
|                             | HBA_HUMAN             |             |                              |             |
|                             | TBB5_HUMAN            |             |                              |             |
|                             | NEUA_HUMAN            |             |                              |             |
|                             | K1C16_HUMAN           |             |                              |             |
|                             | RBBP7_HUMAN           |             |                              |             |
|                             | TBA1A_HUMAN           |             |                              |             |
|                             | HNRPD_HUMAN           |             |                              |             |
|                             | TBB2C_HUMAN           |             |                              |             |
|                             | DBB2_HUMAN            |             |                              |             |
|                             | PAIRB_HUMAN           |             |                              |             |
|                             | ERR1_HUMAN            |             |                              |             |
|                             | PSIP1_HUMAN           |             |                              |             |
|                             | DDX39_HUMAN           |             |                              |             |
|                             | IF4A3_HUMAN           |             |                              |             |
|                             | RCC1_HUMAN            |             |                              |             |
|                             | LDB1_HUMAN            |             |                              |             |
|                             | TBG1_HUMAN            |             |                              |             |
|                             | K1C18_HUMAN           |             |                              |             |
|                             | PAX6_HUMAN            |             |                              |             |

Unmodified DNA Binding Proteins

Analysis Type:

Annotation Version and Release Date:

Analyzed List:

Reference List:

Bonferroni correction:

Bonferroni count:

GO biological process complete

RNA metabolic process (GO:0016070)

transcription, DNA-templated (GO:0006351)

nucleic acid-templated transcription (GO:0097659)

RNA biosynthetic process (GO:0032774)

gene expression (GO:0010467)

nucleic acid metabolic process (GO:0090304)

nucleobase-containing compound biosynthetic process (GO:0034654)

heterocycle biosynthetic process (GO:0018130)

aromatic compound biosynthetic process (GO:0019438)

organic cyclic compound biosynthetic process (GO:1901362)

nucleobase-containing compound metabolic process (GO:0006139)

heterocycle metabolic process (GO:0046483)

cellular aromatic compound metabolic process (GO:0006725)

organic cyclic compound metabolic process (GO:1901360)

cellular nitrogen compound metabolic process (GO:0034641)

cellular macromolecule metabolic process (GO:0044260)

PANTHER Overrepresentation Test (release 20170413)

GO Ontology database Released 2017-05-25

Unmodified (Homo sapiens)

Homo sapiens (all genes in database)

TRUE

8492

Homo sapiens - REFLIST (20972)

|                                                                  | Unmodified (20) | Unmodified (expected) | Unmodified (over/under) | Unmodified (fold Enrichment) | Unmodified (P-value) |
|------------------------------------------------------------------|-----------------|-----------------------|-------------------------|------------------------------|----------------------|
| RNA metabolic process (GO:0016070)                               | 16              | 3.27                  | +                       | 4.89                         | 5.63E-06             |
| transcription, DNA-templated (GO:0006351)                        | 12              | 2.47                  | +                       | 4.87                         | 5.04E-03             |
| nucleic acid-templated transcription (GO:0097659)                | 12              | 2.47                  | +                       | 4.86                         | 5.06E-03             |
| RNA biosynthetic process (GO:0032774)                            | 12              | 2.48                  | +                       | 4.85                         | 5.28E-03             |
| gene expression (GO:0010467)                                     | 16              | 3.55                  | +                       | 4.51                         | 1.92E-05             |
| nucleic acid metabolic process (GO:0090304)                      | 17              | 3.77                  | +                       | 4.51                         | 2.61E-06             |
| nucleobase-containing compound biosynthetic process (GO:0034654) | 12              | 2.81                  | +                       | 4.27                         | 2.07E-02             |
| heterocycle biosynthetic process (GO:0018130)                    | 12              | 2.87                  | +                       | 4.17                         | 2.67E-02             |
| aromatic compound biosynthetic process (GO:0019438)              | 12              | 2.88                  | +                       | 4.17                         | 2.70E-02             |
| organic cyclic compound biosynthetic process (GO:1901362)        | 12              | 3.01                  | +                       | 3.99                         | 4.32E-02             |
| nucleobase-containing compound metabolic process (GO:0006139)    | 17              | 4.30                  | +                       | 3.95                         | 2.22E-05             |
| heterocycle metabolic process (GO:0046483)                       | 17              | 4.47                  | +                       | 3.80                         | 4.09E-05             |
| cellular aromatic compound metabolic process (GO:0006725)        | 17              | 4.50                  | +                       | 3.78                         | 4.64E-05             |
| organic cyclic compound metabolic process (GO:1901360)           | 17              | 4.72                  | +                       | 3.60                         | 9.79E-05             |
| cellular nitrogen compound metabolic process (GO:0034641)        | 17              | 4.88                  | +                       | 3.48                         | 1.72E-04             |
| cellular macromolecule metabolic process (GO:0044260)            | 17              | 6.62                  | +                       | 2.57                         | 2.19E-02             |

Unmod and ShmC

Analysis Type:

Annotation Version and Release Date:

Reference List:

Bonferroni correction:

TRUE

4942

Homo sapiens - REFLIST (20972)

PANTHER Overrepresentation Test (release 20170413)

GO Ontology database, Released 2017-05-25

Unmod and ShmC (Homo sapiens)

Homo sapiens (all genes in database)

TRUE

4942

Homo sapiens - REFLIST (20972)

Unmod and ShmC (71)

Unmod and ShmC (expected)

Unmod and ShmC (over/under)

Unmod and ShmC (fold Enrichment)

Unmod and ShmC (P-value)

|                                                                                                   | Homo sapiens - REFLIST (20972) | Unmod and ShmC (71) | Unmod and ShmC (expected) | Unmod and ShmC (over/under) | Unmod and ShmC (fold Enrichment) | Unmod and ShmC (P-value) |
|---------------------------------------------------------------------------------------------------|--------------------------------|---------------------|---------------------------|-----------------------------|----------------------------------|--------------------------|
| GO biological process complete                                                                    | 9                              | 8                   | 03                        | +                           | 98.46                            | 3.75E-02                 |
| histone H4 deacetylation (GO:0070933)                                                             | 58                             | 8                   | -20                       | +                           | 40.74                            | 2.65E-07                 |
| histone deacetylation (GO:0006476)                                                                | 60                             | 8                   | -20                       | +                           | 39.38                            | 3.45E-07                 |
| protein deacetylation (GO:0035601)                                                                | 65                             | 8                   | -22                       | +                           | 36.35                            | 6.47E-07                 |
| macromolecule deacetylation (GO:0098732)                                                          | 66                             | 8                   | -22                       | +                           | 35.80                            | 7.29E-07                 |
| regulation of telomere maintenance via telomere lengthening (GO:1904356)                          | 61                             | 5                   | -21                       | +                           | 24.21                            | 1.96E-02                 |
| ATP-dependent chromatin remodeling (GO:0043044)                                                   | 63                             | 5                   | -21                       | +                           | 23.44                            | 2.29E-02                 |
| cornification (GO:0070268)                                                                        | 110                            | 8                   | -37                       | +                           | 21.48                            | 3.86E-05                 |
| skin epidermis development (GO:0098773)                                                           | 83                             | 6                   | -28                       | +                           | 21.35                            | 3.75E-03                 |
| regulation of mRNA splicing, via spliceosome (GO:0048024)                                         | 72                             | 5                   | -24                       | +                           | 20.51                            | 4.37E-02                 |
| chromatin remodeling (GO:0006338)                                                                 | 149                            | 9                   | -50                       | +                           | 17.84                            | 1.96E-05                 |
| regulation of RNA splicing (GO:0043484)                                                           | 110                            | 6                   | -37                       | +                           | 16.11                            | 1.89E-02                 |
| circadian rhythm (GO:0007623)                                                                     | 135                            | 7                   | -46                       | +                           | 15.32                            | 3.61E-03                 |
| mRNA splicing, via spliceosome (GO:0000398)                                                       | 284                            | 13                  | -96                       | +                           | 13.52                            | 1.22E-07                 |
| RNA splicing, via transesterification reactions with bulged adenosine as nucleophile (GO:0000377) | 284                            | 13                  | -96                       | +                           | 13.52                            | 1.22E-07                 |
| RNA splicing, via transesterification reactions (GO:0000375)                                      | 287                            | 13                  | -97                       | +                           | 13.38                            | 1.39E-07                 |
| DNA recombination (GO:0006310)                                                                    | 226                            | 10                  | -77                       | +                           | 13.07                            | 4.55E-05                 |
| double-strand break repair (GO:0006302)                                                           | 163                            | 7                   | -55                       | +                           | 12.69                            | 1.25E-02                 |
| DNA replication (GO:0006260)                                                                      | 213                            | 9                   | -72                       | +                           | 12.48                            | 4.12E-04                 |
| histone modification (GO:0016570)                                                                 | 346                            | 13                  | -117                      | +                           | 11.10                            | 1.35E-06                 |
| protein-DNA complex assembly (GO:0050004)                                                         | 192                            | 7                   | -65                       | +                           | 10.77                            | 3.65E-02                 |
| epidermal cell differentiation (GO:0009913)                                                       | 308                            | 11                  | -104                      | +                           | 10.55                            | 6.63E-05                 |
| keratinization (GO:0031424)                                                                       | 224                            | 8                   | -76                       | +                           | 10.55                            | 8.41E-03                 |
| keratinocyte differentiation (GO:0030216)                                                         | 266                            | 9                   | -90                       | +                           | 9.99                             | 2.64E-03                 |
| RNA splicing (GO:0008380)                                                                         | 393                            | 13                  | -133                      | +                           | 9.77                             | 6.28E-06                 |
| DNA conformation change (GO:0071103)                                                              | 254                            | 8                   | -75                       | +                           | 9.30                             | 2.12E-02                 |
| rhythmic process (GO:0048511)                                                                     | 288                            | 9                   | -98                       | +                           | 9.23                             | 5.10E-03                 |
| DNA metabolic process (GO:0006259)                                                                | 777                            | 24                  | -263                      | +                           | 9.12                             | 3.68E-13                 |
| mRNA processing (GO:0006397)                                                                      | 454                            | 14                  | -154                      | +                           | 9.11                             | 3.18E-06                 |
| DNA repair (GO:0006281)                                                                           | 489                            | 15                  | -166                      | +                           | 9.06                             | 7.40E-07                 |
| covalent chromatin modification (GO:0016569)                                                      | 465                            | 15                  | -157                      | +                           | 8.89                             | 4.32E-06                 |
| skin development (GO:0043588)                                                                     | 372                            | 11                  | -126                      | +                           | 8.73                             | 4.46E-04                 |
| epidermis development (GO:0008544)                                                                | 405                            | 11                  | -137                      | +                           | 8.02                             | 1.04E-03                 |
| chromatin organization (GO:0006325)                                                               | 648                            | 16                  | -219                      | +                           | 7.29                             | 3.72E-06                 |
| mRNA metabolic process (GO:0016071)                                                               | 663                            | 16                  | -224                      | +                           | 7.13                             | 5.17E-06                 |
| cellular response to DNA damage (GO:0006974)                                                      | 71                             | 7                   | -57                       | +                           | 6.87                             | 2.40E-06                 |
| chromosome organization (GO:0051276)                                                              | 1009                           | 23                  | -342                      | +                           | 6.73                             | 1.15E-09                 |
| negative regulation of transcription from RNA polymerase II promoter (GO:0000122)                 | 772                            | 16                  | -261                      | +                           | 6.12                             | 4.48E-05                 |
| epithelial cell differentiation (GO:0030855)                                                      | 653                            | 13                  | -221                      | +                           | 5.88                             | 2.35E-03                 |
| negative regulation of nucleobase-containing compound metabolic process (GO:0045934)              | 1357                           | 25                  | -459                      | +                           | 5.44                             | 8.33E-09                 |
| RNA processing (GO:0006396)                                                                       | 870                            | 16                  | -295                      | +                           | 5.43                             | 2.36E-04                 |
| negative regulation of cellular macromolecule biosynthetic process (GO:2000113)                   | 1318                           | 23                  | -446                      | +                           | 5.15                             | 2.64E-07                 |
| negative regulation of RNA metabolic process (GO:0051253)                                         | 1205                           | 21                  | -408                      | +                           | 5.15                             | 2.47E-06                 |
| negative regulation of transcription, DNA-templated (GO:0045892)                                  | 1117                           | 19                  | -378                      | +                           | 5.02                             | 3.17E-05                 |
| positive regulation of transcription from RNA polymerase II promoter (GO:0045944)                 | 1064                           | 18                  | -360                      | +                           | 5.00                             | 9.72E-05                 |
| positive regulation of RNA metabolic process (GO:0051254)                                         | 1429                           | 24                  | -484                      | +                           | 4.96                             | 1.90E-07                 |
| negative regulation of macromolecule biosynthetic process (GO:0010558)                            | 1389                           | 23                  | -470                      | +                           | 4.89                             | 7.48E-07                 |
| negative regulation of nucleic acid-templated transcription (GO:1903507)                          | 1160                           | 19                  | -393                      | +                           | 4.84                             | 5.84E-05                 |
| negative regulation of RNA biosynthetic process (GO:1902679)                                      | 1162                           | 19                  | -393                      | +                           | 4.83                             | 6.00E-05                 |
| positive regulation of nucleobase-containing compound metabolic process (GO:0045935)              | 1684                           | 27                  | -570                      | +                           | 4.74                             | 1.94E-08                 |
| positive regulation of gene expression (GO:0010628)                                               | 1720                           | 27                  | -582                      | +                           | 4.64                             | 3.18E-08                 |
| negative regulation of cellular biosynthetic process (GO:0031327)                                 | 1466                           | 23                  | -496                      | +                           | 4.63                             | 2.16E-06                 |
| negative regulation of gene expression (GO:0010629)                                               | 1597                           | 25                  | -541                      | +                           | 4.62                             | 2.85E-07                 |
| negative regulation of biosynthetic process (GO:0009890)                                          | 1487                           | 23                  | -503                      | +                           | 4.57                             | 2.86E-06                 |
| positive regulation of nucleic acid-templated transcription (GO:1903508)                          | 1378                           | 21                  | -467                      | +                           | 4.50                             | 2.73E-05                 |
| positive regulation of transcription, DNA-templated (GO:0045893)                                  | 1378                           | 21                  | -467                      | +                           | 4.50                             | 2.73E-05                 |
| positive regulation of RNA biosynthetic process (GO:1902680)                                      | 1470                           | 23                  | -467                      | +                           | 4.50                             | 2.73E-05                 |
| positive regulation of macromolecule biosynthetic process (GO:0010557)                            | 1628                           | 24                  | -551                      | +                           | 4.35                             | 2.74E-06                 |
| cellular response to stress (GO:0033554)                                                          | 1561                           | 23                  | -528                      | +                           | 4.35                             | 7.34E-06                 |
| regulation of transcription from RNA polymerase II promoter (GO:0006357)                          | 1908                           | 27                  | -646                      | +                           | 4.18                             | 3.46E-07                 |
| transcription, DNA-templated (GO:0006351)                                                         | 2586                           | 36                  | -875                      | +                           | 4.11                             | 4.08E-11                 |
| nucleic acid-templated transcription (GO:0097659)                                                 | 2587                           | 36                  | -876                      | +                           | 4.11                             | 4.13E-11                 |
| RNA biosynthetic process (GO:0032774)                                                             | 2597                           | 36                  | -879                      | +                           | 4.09                             | 4.66E-11                 |
| positive regulation of cellular biosynthetic process (GO:0031328)                                 | 1761                           | 24                  | -596                      | +                           | 4.03                             | 1.33E-05                 |
| nucleobase-containing compound biosynthetic process (GO:0034654)                                  | 2944                           | 40                  | -997                      | +                           | 4.01                             | 8.79E-13                 |
| positive regulation of biosynthetic process (GO:0009891)                                          | 1791                           | 24                  | -606                      | +                           | 3.96                             | 1.86E-05                 |
| nucleic acid metabolic process (GO:0009030)                                                       | 3926                           | 53                  | -1339                     | +                           | 3.96                             | 3.69E-20                 |
| RNA metabolic process (GO:0016070)                                                                | 3434                           | 46                  | -1163                     | +                           | 3.96                             | 7.67E-16                 |
| heterocycle biosynthetic process (GO:0018130)                                                     | 3014                           | 40                  | -1020                     | +                           | 3.92                             | 2.00E-12                 |
| aromatic compound biosynthetic process (GO:0019438)                                               | 3017                           | 40                  | -1021                     | +                           | 3.92                             | 2.07E-12                 |
| organic cyclic compound biosynthetic process (GO:1901362)                                         | 3152                           | 40                  | -1067                     | +                           | 3.75                             | 9.53E-12                 |
| gene expression (GO:0010467)                                                                      | 2722                           | 47                  | -1260                     | +                           | 3.73                             | 2.37E-15                 |
| cellular nitrogen compound biosynthetic process (GO:0044271)                                      | 3455                           | 43                  | -1170                     | +                           | 3.68                             | 6.09E-13                 |
| cellular macromolecule biosynthetic process (GO:0034645)                                          | 3659                           | 45                  | -1239                     | +                           | 3.63                             | 8.76E-14                 |
| macromolecule biosynthetic process (GO:0009059)                                                   | 3723                           | 45                  | -1260                     | +                           | 3.57                             | 1.74E-13                 |
| negative regulation of nitrogen compound metabolic process (GO:0051172)                           | 2249                           | 27                  | -761                      | +                           | 3.55                             | 1.38E-05                 |
| negative regulation of macromolecule metabolic process (GO:0010605)                               | 2444                           | 29                  | -827                      | +                           | 3.50                             | 3.21E-06                 |
| nucleobase-containing compound metabolic process (GO:0006139)                                     | 4512                           | 53                  | -1528                     | +                           | 3.47                             | 1.60E-17                 |
| regulation of nucleobase-containing compound metabolic process (GO:0019219)                       | 4141                           | 47                  | -1402                     | +                           | 3.35                             | 2.01E-13                 |
| heterocycle metabolic process (GO:0046483)                                                        | 4685                           | 53                  | -1586                     | +                           | 3.34                             | 9.75E-17                 |
| negative regulation of cellular metabolic process (GO:0031324)                                    | 2405                           | 27                  | -814                      | +                           | 3.32                             | 5.93E-05                 |
| cellular aromatic compound metabolic process (GO:0006725)                                         | 4722                           | 53                  | -1599                     | +                           | 3.32                             | 1.42E-16                 |
| regulation of RNA metabolic process (GO:0051252)                                                  | 3777                           | 41                  | -1279                     | +                           | 3.21                             | 7.46E-10                 |
| negative regulation of metabolic process (GO:0010604)                                             | 2688                           | 29                  | -910                      | +                           | 3.19                             | 3.07E-05                 |
| organic cyclic compound metabolic process (GO:0010604)                                            | 2892                           | 31                  | -979                      | +                           | 3.17                             | 7.52E-06                 |
| organelle organization (GO:0006996)                                                               | 4945                           | 53                  | -1674                     | +                           | 3.17                             | 1.29E-15                 |
| cellular component assembly (GO:0022607)                                                          | 2254                           | 22                  | -763                      | +                           | 3.15                             | 1.75E-06                 |
| organic substance biosynthetic process (GO:1901576)                                               | 4742                           | 46                  | -1605                     | +                           | 2.87                             | 3.28E-10                 |
| cellular biosynthetic process (GO:0044249)                                                        | 4655                           | 45                  | -1576                     | +                           | 2.86                             | 9.98E-10                 |
| regulation of cellular biosynthetic process (GO:0031326)                                          | 4362                           | 42                  | -1477                     | +                           | 2.84                             | 1.86E-08                 |
| positive regulation of cellular metabolic process (GO:0031325)                                    | 2917                           | 28                  | -988                      | +                           | 2.84                             | 8.42E-04                 |
| cellular component biogenesis (GO:0044085)                                                        | 2508                           | 24                  | -849                      | +                           | 2.83                             | 1.10E-02                 |
| biosynthetic process (GO:0009058)                                                                 | 4809                           | 46                  | -1628                     | +                           | 2.83                             | 5.66E-10                 |
| regulation of biosynthetic process (GO:0009889)                                                   | 4432                           | 42                  | -1500                     | +                           | 2.80                             | 3.22E-08                 |
| response to stress (GO:0006950)                                                                   | 3263                           | 29                  | -1105                     | +                           | 2.63                             | 2.37E-03                 |
| cellular component organization (GO:0016043)                                                      | 5242                           | 45                  | -1775                     | +                           | 2.54                             | 8.33E-08                 |
| cellular macromolecule metabolic process (GO:0044260)                                             | 6946                           | 59                  | -2352                     | +                           | 2.51                             | 4.68E-14                 |
| cellular component organization or biogenesis (GO:0071840)                                        | 5457                           | 46                  | -1847                     | +                           | 2.49                             | 7.05E-08                 |
| regulation of macromolecule metabolic process (GO:0060255)                                        | 6010                           | 49                  | -2035                     | +                           | 2.41                             | 1.93E-08                 |
| regulation of nitrogen compound metabolic process (GO:0051171)                                    | 5811                           | 47                  | -1967                     | +                           | 2.39                             | 1.46E-07                 |
| regulation of primary metabolic process (GO:0080090)                                              | 5976                           | 47                  | -2023                     | +                           | 2.32                             | 4.23E-07                 |
| regulation of cellular metabolic process (GO:0031323)                                             | 6029                           | 47                  | -2041                     | +                           | 2.30                             | 5.90E-07                 |
| macromolecule metabolic process (GO:0043170)                                                      | 7685                           | 59                  | -2602                     | +                           | 2.27                             | 9.70E-12                 |
| regulation of metabolic process (GO:0019222)                                                      | 6533                           | 49                  | -2212                     | +                           | 2.22                             | 5.40E-07                 |
| negative regulation of cellular process (GO:0048523)                                              | 4291                           | 32                  | -1453                     | +                           | 2.20                             | 2.26E-02                 |
| negative regulation of biological process (GO:0048519)                                            | 4778                           | 34                  | -1618                     | +                           | 2.10                             | 2.58E-02                 |
| nitrogen compound metabolic process (GO:0006807)                                                  | 8534                           | 58                  | -2889                     | +                           | 2.01                             | 1.46E-08                 |
| cellular metabolic process (GO:0044237)                                                           | 8936                           | 60                  | -3025                     | +                           | 1.98                             | 3.28E-09                 |
| primary metabolic process (GO:0044238)                                                            | 9069                           | 60                  | -3070                     | +                           | 1.89                             | 2.86E-07                 |
| organic substance metabolic process (GO:0071704)                                                  | 9416                           | 60                  | -3188                     | +                           | 1.88                             | 4.91E-08                 |
| metabolic process (GO:0008152)                                                                    | 9878                           | 60                  | -3344                     | +                           | 1.79                             | 5.64E-07                 |
| cellular process (GO:0009987)                                                                     | 14882                          | 68                  | -5038                     | +                           | 1.35                             | 9.80E-04                 |
| Unclassified (UNCLASSIFIED)                                                                       | 3700                           | 2                   | -12.53                    | -                           | 0.02                             | 0.0000                   |

5hmC Binding Proteins

Analysis Type:

PANTHER Overrepresentation Test (release 20160715)

Annotation Version and Release Date:

GO Ontology database Released 2017-02-28

Analyzed List:

5hmC (Homo sapiens)

Reference List:

Homo sapiens (all genes in database)

Bonferroni correction:

TRUE

Bonferroni count:

8204

GO biological process complete

Homo sapiens - REFLIST (20972)

5hmC (46)

5hmC (expected)

5hmC (over/under)

5hmC (fold Enrichment)

5hmC (P-value)

DNA duplex unwinding (GO:0032508)

77

5

.17

+

29.60

6.62E-03

DNA geometric change (GO:0032392)

87

5

.19

+

26.20

1.20E-02

sister chromatid cohesion (GO:0007062)

114

5

.25

+

20.00

4.43E-02

sister chromatid segregation (GO:0000819)

183

7

.40

+

17.44

1.26E-03

nuclear chromosome segregation (GO:0098813)

254

7

.56

+

12.56

1.11E-02

chromosome segregation (GO:0007059)

295

8

.65

+

12.36

2.04E-03

chromosome organization (GO:0051276)

1012

16

2.22

+

7.21

1.75E-06

mitotic cell cycle process (GO:1903047)

766

12

1.68

+

7.14

5.63E-04

mitotic cell cycle (GO:0000278)

794

12

1.74

+

6.89

8.30E-04

DNA metabolic process (GO:0006259)

781

10

1.71

+

5.84

5.00E-02

cell cycle process (GO:0022402)

1091

12

2.39

+

5.01

2.37E-02

cell cycle (GO:0007049)

1337

13

2.93

+

4.43

3.24E-02

organelle organization (GO:0006996)

3186

24

6.99

+

3.43

4.66E-05

nucleic acid metabolic process (GO:0090304)

3978

24

8.73

+

2.75

3.73E-03

nucleobase-containing compound metabolic process (GO:0006139)

4531

24

9.94

+

2.41

4.29E-02

cellular component organization or biogenesis (GO:0071840)

5493

29

12.05

+

2.41

1.37E-03

cellular component organization (GO:0016043)

5278

27

11.58

+

2.33

1.18E-02

Unclassified (UNCLASSIFIED)

3732

3

8.19

-

.37

0.00E00

|                       | G1 (%)                       | S (%)        | G2/M (%)     | Polyploid (%) | G1 (hrs)                     | S (hrs)     | G2/M (hrs)  | Polyploid (hrs) |
|-----------------------|------------------------------|--------------|--------------|---------------|------------------------------|-------------|-------------|-----------------|
| Control               | 28.67 ± 2.37                 | 25.24 ± 1.49 | 27.04 ± 0.91 | 15.46 ± 2.83  | 4.59 ± 0.38                  | 4.1 ± 0.24  | 4.49 ± 0.15 | 2.51 ± 0.45     |
| Tet2 CD               | 47.25 ± 2.56                 | 35.48 ± 1.91 | 12.90 ± 1.77 | 1.44 ± 0.84   | 7.57 ± 0.49                  | 5.68 ± 0.37 | 2.06 ± 0.34 | 0.23 ± 0.16     |
| Tet2 CD/CI            | 45.78 ± 2.37                 | 38.17 ± 1.76 | 11.14 ± 0.91 | 0.61 ± 2.83   | 7.32 ± 0.24                  | 6.11 ± 0.91 | 1.78 ± 0.10 | 0.10 ± 0.07     |
|                       | Two Tailed Students' t-tests |              |              |               | Two Tailed Students' t-tests |             |             |                 |
| Control vs Tet2 CD    | < 0.001                      | 0.002        | < 0.001      | 0.001         | < 0.001                      | < 0.001     | < 0.001     | 0.001           |
| Control vs Tet2 CD/CI | < 0.001                      | 0.017        | 0.243        | 0.001         | < 0.001                      | < 0.001     | 0.291       | < 0.001         |
| Tet2 CD vs Tet2 CD/CI | 0.290                        | 0.596        | 0.416        | 0.219         | 0.097                        | 0.876       | 0.267       | 0.207           |

## Supplemental Table S6

### Tet2 cDNA constructs used to create stable cell lines

| >pEYFP-Tet2 CD |             |             |             |             |             |      |
|----------------|-------------|-------------|-------------|-------------|-------------|------|
| TAGTTATTAA     | TAGTAATCAA  | TTACGGGGTC  | ATTAGTTCAT  | AGCCCATATA  | TGGAGTTCGG  | 60   |
| CGTTACATAA     | CTTACGGTAA  | ATGGCCCCGC  | TGGCTGACCG  | CCCAACGACC  | CCCGCCATT   | 120  |
| GACGTCAAATA    | ATGACGTATG  | TTCCCATAGT  | AACGCCAATA  | GGGACTTTC   | ATTGACGTCA  | 180  |
| ATGGGTGGAG     | TATTTACGGT  | AAACTGCCCA  | CTTGGCAGTA  | CATCAAGTGT  | ATCATATGCC  | 240  |
| AAGTACGCC      | CCTATTGACG  | TCAATGACGG  | TAAATGGCCC  | GCCTGGCATT  | ATGCCAGTA   | 300  |
| CATGACCTTA     | TGGGACTTTC  | CTACTTGGCA  | GTACATCTAC  | GTATTAGTCA  | TCGCTATTAC  | 360  |
| CATGGTGATG     | CGGTTTTGGC  | AGTACATCAA  | TGGGCGTGGA  | TAGCGGTTTG  | ACTCACGGGG  | 420  |
| ATTTCCAAGT     | CTCCACCCCA  | TTGACGTCAA  | TGGGAGTTTG  | TTTTGGCACC  | AAAATCAACG  | 480  |
| GGACTTTCCA     | AAATGTCTGA  | ACAACTCCGC  | CCCATTGACG  | CAAATGGGCG  | GTAGGCGTGT  | 540  |
| ACGGTGGGAG     | GTCTATATAA  | GCAGAGCTGG  | TTTAGTGAAC  | CGTCAGATCC  | GCTAGCGCTA  | 600  |
| CCGGTCGCCA     | CCATGGTGAG  | CAAGGGCGAG  | GAGCTGTTC   | CCGGGGTGGT  | GCCCATCTCG  | 660  |
| GTCGAGCTGG     | ACGGCGACGT  | AAACGGCCAC  | AAGTTCAGCG  | TGTCCGGCGA  | GGGCGAGGGC  | 720  |
| GATGCCACCT     | ACGGCAAGCT  | GACCCTGAAG  | TTTCATCTGCA | CCACCGGCAA  | GCTGCCCGTG  | 780  |
| CCCTGGCCCA     | CCCTCGTGAC  | CACCTTCGGC  | TACGGCCTCG  | AGTGCTTCGC  | CCGTACCC    | 840  |
| GACCACATGA     | AGCAGCACGA  | CTTCTTCAAG  | TCCGCCATGC  | CCGAAGGCTA  | CGTCCAGGAG  | 900  |
| CGCACCATCT     | TCCTCAAGGA  | CGACGGCAAC  | TACAAGACCC  | GCGCCGAGGT  | GAAGTTCGAG  | 960  |
| GGCGACACCC     | TGGTGAACCG  | CATCGAGCTG  | AAGGGCATCG  | ACTTCAAGGA  | GGACGGCAAC  | 1020 |
| ATCCTGGGGC     | ACAAGCTGGA  | GTACAACCTAC | AACAGCCACA  | ACGTCTATAT  | CATGGCCGAC  | 1080 |
| AAGCAGAAGA     | ACGGCATCAA  | GGTGAACCTC  | AAGATCCGCC  | ACAACATCGA  | GGACGGCAGC  | 1140 |
| GTGAGCTCG      | CCGACCACCTA | CCAGCAGAAC  | ACCCCCATCG  | GCGACGGCCC  | CGTGTCTGTG  | 1200 |
| CCCGACAACC     | ACTACCTGAG  | CTACCAGTCC  | GCCCTGAGCA  | AAGACCCCAA  | CGAGAAGCGC  | 1260 |
| GATCACATGG     | TCCGTCTGGA  | GTTCGTGACC  | GCCGCCGGGA  | TCACTCTCGG  | CATGGACGAG  | 1320 |
| CTGTACAAGT     | CCGGACTCAG  | ATCTCGAGCT  | CAAGCTTCGA  | ATTCTGCAGT  | CGACGGTACC  | 1380 |
| GCGGGCCCCG     | CGCTTATGGA  | CTACAAAGAC  | GATGACGACA  | AGGGATCCAC  | TAGTAACGGC  | 1440 |
| GCCAGTGTG      | CTGGAATTCG  | CCCTTTACAA  | AGTCAGAAATG | GCAAATGTGA  | AGGATGCAAT  | 1500 |
| CCAGACAAAG     | ATGAAGCTCC  | TTATTATACC  | CATCTGGGAG  | CTGGTCTCTGA | TGTGGCAGCT  | 1560 |
| ATTAGAACAC     | TCATGGAAGA  | AAGGTATGGA  | GAGAAGGGTA  | AAGCTATTAG  | GATTGAAAAA  | 1620 |
| GTCATATATA     | CTGGTAAAGA  | AGGCAAGAGC  | TCTCAGGGAT  | GTCTTATTGC  | TAAATGGGTA  | 1680 |
| TATCGGAGAT     | CGAGTGAGGA  | GGAGAAACTA  | CTGTGTTTGG  | TACGAGTGCC  | ACCTAATCAC  | 1740 |
| ACATGTGAGA     | CGGCGGTGAT  | GGTAATTGCC  | ATCATGTGTG  | GGGACGGAAAT | CCCAAAGTCA  | 1800 |
| CTCGCATCAG     | AATCTACTC   | AGAACTTACA  | GATATCTTGG  | GCAAGTGTGG  | CATATGCACC  | 1860 |
| AACCGTCCGT     | GTCTCTAGAA  | TGAAACTAGA  | AACTGTGTGT  | GTCAGGGTGA  | GAATCCAGAG  | 1920 |
| ACCGTGGGTG     | CCTCCTTTTC  | TTTTGGTGTG  | TCTTGGAGCA  | TGTACTATAA  | TGGATGTAAG  | 1980 |
| TTTGCCAGAA     | GCAAGAAACC  | AAGGAAATTT  | AGGCTACATG  | GAGCTGAGCC  | AAAAGAGGAA  | 2040 |
| GAGAGACTAG     | GTTCTCATTT  | GCAAAACCTG  | GCTACTGTCA  | TTGCTCCAAT  | ATACAAGAAG  | 2100 |
| CTTGACCCCG     | ATGCATACAA  | TAATCAGGTT  | GAATTTGAAC  | ACCAAGCCCC  | AGACTGCTGT  | 2160 |
| TTGGTCTCTA     | AGGAAGGCCG  | GCCATTTCTA  | GGATCCTACTG | CATGTTTGGG  | CTTCTCTGCT  | 2220 |
| CATTTCCACA     | GAGACCAGCA  | GAACATGCCA  | AATGGCAGTA  | CAGTGGTGGT  | CACCCCTCAAT | 2280 |
| AGAGAAGACA     | ATCGAGAAGT  | CGGAGCTAAG  | CCTGAGGATG  | AGCAGTTC    | CGTGTCTGCT  | 2340 |
| ATGTACATCA     | TCGCCCTTGA  | GGATGAGTTT  | GGGAGTACGG  | AAGGCCAGGA  | GAAGAAGATA  | 2400 |
| CGGATGGGGT     | CCATTGAGGT  | TCGTGAGTCA  | TTTCGGAGGA  | GAAGGGTCAT  | AAGGATAGGA  | 2460 |
| GAGCTGCCCA     | AGAGTTGCAA  | GAAGAAAGCG  | GAGCCCAAGA  | AAGCCAAGAC  | CAAGAAAGCA  | 2520 |
| GCTCGAAAGC     | GTTCCTCTCT  | GGAGAACTGC  | TCCAGTAGGA  | CTGAGAAGGG  | AAAGTCTTCC  | 2580 |
| TCACATACAA     | AGCTGATGGA  | AAATGCAAGC  | CATATGAAAC  | AAATGACAGC  | ACAACCCGAC  | 2640 |
| CTTTCGGGCC     | CGGTCTATCCG | GCAGCCACCA  | ACACTCCAGA  | GGCACCTTCA  | GCAAGGGCAG  | 2700 |
| AGGCCACAGC     | AGCCGCAGCC  | ACCTCAGCCG  | CAGCCGCAGA  | CGACACCTCA  | GCCACAGCCA  | 2760 |
| CAGCCACAGC     | ATATCATGCC  | CGGTAACCTC  | CAGTCTGTTG  | GTTCTCATTTG | TTCTGGATCC  | 2820 |
| ACCATGTCTT     | ACACGAGACA  | GCCTACTCCT  | CACAGTCTCT  | ATCCCAGCTC  | AGCACACACT  | 2880 |
| TCAGATATTT     | ATGGAGATAC  | CAACCATGTG  | AACTTTTACC  | CCACTTCATC  | TCATGCCTCG  | 2940 |
| GGTTCATATT     | TGAATCCTTC  | TAATTACATG  | AACCCCTACC  | TTGGGCTTTT  | GAATCAGAAT  | 3000 |
| AACCAATATG     | CACCTTTTCC  | ATACAATGGG  | AGTGTGCCAG  | TGGACAATGG  | TTCCCTTTTC  | 3060 |
| TTAGTTCCTT     | ATTCCCCCA   | GGCTCAGTCC  | AGGGATCTAC  | ATAGATATCC  | AAACCAGGAC  | 3120 |
| CATCTCACCA     | ATCAGAACTT  | ACCACCCATC  | CACACCCTTC  | ACCAACAGAC  | GTTTGGGGAC  | 3180 |
| AGTCCCTCTA     | AGTACTTAAG  | TTATGGA AAC | CAAAATATGC  | AGAGAGATGC  | CTTCACTACT  | 3240 |
| AACTCCACCC     | TAAAACCAA   | TGTACACCAC  | CTAGCAACGT  | TTTCTCCTTA  | CCCCACCCC   | 3300 |
| AAGATGGATA     | GTCATTTTCT  | GGGAGCTGCC  | TACAGATCAC  | CATACAGCCA  | CCCACACACT  | 3360 |
| GACTACAAA      | CCAGTGAGCA  | TCATCTACCC  | TCTCACACGG  | TCTACAGCTA  | CACGGCAGCA  | 3420 |
| GCTTCGGGGA     | GCACTTCCAG  | CCACGCCTTC  | CACAACAAGG  | AGAATGACAA  | CATAGCCAAT  | 3480 |
| GGGCTCTCAA     | GAGTGCTTCC  | AGGGTTTAA   | CATGATAGAA  | CTGCTTCTGC  | CCAAGAACTA  | 3540 |
| TTATACAGTC     | TGACTGGCAG  | CAGTCAGGAG  | AAGCAGCCTG  | AGGTGTCAGG  | CCAGGATGCA  | 3600 |
| GCTGCTGTGC     | AGGAAATTGA  | GTATTGGTCA  | GATAGTGAGC  | ACAACCTTCA  | GGATCCTTGC  | 3660 |
| ATTGGAGGGG     | TGGCTATAGC  | CCCAACTCAT  | GGGTCAATTC  | TTATTGAGTG  | TGCAAAGTGT  | 3720 |
| GAGGTTTCATG    | CCACAACCAA  | AGTAAACGAT  | CCCAGCCGGA  | ATCACCCCA   | CAGGATCTCA  | 3780 |
| CTTGTACTGT     | ATAGGCATAA  | GAATTTGTTT  | CTACCAAAAC  | ATTGTTTGGC  | TCTCTGGGAA  | 3840 |
| GCCAAAATGG     | CTGAAAAGGC  | CCGAAAAGAG  | GAAGAGTGGC  | GAAAGAATGG  | ATCAGACCAC  | 3900 |
| GTGTCTCAGA     | AAAATCATGG  | CAACAGGAA   | AAGCGTGAGC  | CCACAGGGCC  | ACAGGAACCC  | 3960 |
| AGTTACCTGC     | GTTTCATCCA  | GTCTCTTGTG  | GAGAACACAG  | GGTCTGTGAC  | TACGGATTCT  | 4020 |
| ACCGTGACTA     | CATCACCATA  | TGCTTTCACT  | CAGGTCACAG  | GGCCTTACAA  | CACATTTGTT  | 4080 |
| AATAACTGAT     | CATAATCAGC  | CATACCACAT  | TTGTAGAGGT  | TTTACTTGCT  | TTAAAAAACC  | 4140 |
| TCCCACACCT     | CCCCCTGAAC  | CTGAAACATA  | AAATGAATGC  | AATTGTTGTT  | GTTAACTTGT  | 4200 |
| TTATTGCAGC     | TTATAATGGT  | TACAAATAAA  | GCAATAGCAT  | CACAAATTTT  | ACAAATAAAG  | 4260 |
| CATTTTTTTC     | ACTGCATTCT  | AGTTGTGGTT  | TGTCCAAACT  | CATCAATGTA  | TCTTAAAGGC  | 4320 |

|            |            |            |            |             |             |      |
|------------|------------|------------|------------|-------------|-------------|------|
| TAAATTGTAA | GCGTAAATAT | TTTGTAAAA  | TTCGCGTTAA | ATTTTTGTTA  | AATCAGCTCA  | 4380 |
| TTTTTTAACC | AATAGGCCGA | AATCGGCCAA | ATCCCTTATA | AATCAAAAAG  | ATAGACCGAG  | 4440 |
| ATAGGGTTGA | GTGTTGTTCC | AGTTTGGAAC | AAGAGTCCAC | TATTAAGAA   | CGTGGACTCC  | 4500 |
| AACGTCAAAG | GGCGAAAAAC | CGTCTATCAG | GGCGATGGCC | CACTACGTGA  | ACCATCACCC  | 4560 |
| TAAUCAAGTT | TTTTGGGGTC | GAGGTGCCGT | AAAGCACTAA | ATCGGAACCC  | TAAAGGGAGC  | 4620 |
| CCCCGATTTA | GAGCTTGACG | GGGAAAGCCG | GCGAACGTGG | CGAGAAAGGA  | AGGGAAGAAA  | 4680 |
| GCGAAAGGAG | CGGGCGCTAG | GGCGCTGGCA | AGTGTAGCGG | TCACGCTGCG  | CGTAACCACC  | 4740 |
| ACACCCGCCG | CGCTTAATGC | GCCGCTACAG | GGCGCGTCAG | GTGGCACTTT  | TCGGGGAAAT  | 4800 |
| GTGCGCGGAA | CCCTATTTTG | TTTATTTTTC | TAAATACATT | CAAATATGTA  | TCCGCTCATG  | 4860 |
| AGACAATAAC | CCTGATAAAT | GCTTCAATA  | TATTGAAAA  | GGAAGAGTCC  | TGAGGGCGAA  | 4920 |
| AGAACCAGCT | GTGGAATGTG | TGTCAGTTAG | GGTGTGAAAA | GTCCCCAGGC  | TCCCCAGCAG  | 4980 |
| GCAGAAGTAT | GCAAAGCATG | CATCTCAATT | AGTCAGCAAC | CAGGTGTGGA  | AAGTCCCCAG  | 5040 |
| GCTCCCCAGC | AGGCAGAAGT | ATGCAAAGCA | TGCATCTCAA | TTAGTCAGCA  | ACCATAGTCC  | 5100 |
| CGCCCTAAC  | TCGCCCCATC | CGCCCCFAA  | CTCCGCCAG  | TCGCCCCAT   | TCTCCGCCCC  | 5160 |
| ATGGCTGACT | AATTTTTTTT | ATTTATGCA  | AGGCCGAGGC | CGCCTCGGCC  | TCTGAGCTAT  | 5220 |
| TCCAGAAGTA | GTGAGGAGGC | TTTTTTGGAG | GCCTAGGCTT | TGCAAAGAT   | CGATCAAGAG  | 5280 |
| ACAGGATGAG | GATCGTTTTC | CATGATTGAA | CAAGATGGAT | TGCACGCAGG  | TTCTCCGGCC  | 5340 |
| GCTTGGGTGG | AGAGGCTATT | CGGCTATGAC | TGGCCACAAC | AGACAATCGG  | CTGCTCTGAT  | 5400 |
| GCCGCCGTGT | TCCGGCTGTC | AGCGCAGGGG | CGCCCGGTT  | TTTTTTGTCAA | GACCGACCTG  | 5460 |
| TCCGGTGCCC | TGAATGAACT | GCAAGACGAG | GCGACGCGGC | TATCGTGGCT  | GGCCACGACG  | 5520 |
| GGCGTTCCTT | GCGCAGCTGT | GCTCGACGTT | GTCACTGAAG | CGGGAAGGGA  | CTGGCTGCTA  | 5580 |
| TTGGCGAAG  | TGCCGGGGCA | GGATCTCCTG | TCATCTCACC | TTGCTCCTGC  | CGAGAAAGTA  | 5640 |
| TCCATCATGG | CTGATGCAAT | GCGGCGGCTG | CATACGCTTG | ATCCGGCTAC  | CTGCCCATTC  | 5700 |
| GACCACCAAG | CGAAACATCG | CATCGAGCGA | GCACGTAATC | GGATGGAAGC  | CGGTCTTGTC  | 5760 |
| GATCAGGATG | ATCTGGACGA | AGAGCATCAG | GGGCTCGCGC | CAGCCGAACT  | GTTCCGCCAG  | 5820 |
| CTCAAGCGGA | GCATGCCCGA | CGCGGAGGAT | CTCGTCTGTA | CCCATGGCGA  | TGCCTGCTTG  | 5880 |
| CCGAATATCA | TGGTGAAAA  | TGGCCGCTTT | TCTGGATTCA | TCGACTGTGG  | CCGGCTGGGT  | 5940 |
| GTGGCGGACC | GCTATCAGGA | CATAGCGTTG | GCTACCCGTG | ATATTGCTGA  | AGAGCTTGGC  | 6000 |
| GCGCAATGGG | CTGACCGCTT | CCTCGTGCTT | TACGGTATCG | CCGCTCCCGA  | TTCCGACGGC  | 6060 |
| ATCGCCTTCT | ATCGCCTTCT | TGACGAGTTC | TTCTGAGCGG | GACTCTGGGG  | TTCGAAATGA  | 6120 |
| CCGACCAAGC | GACGCCAAC  | CTGCCATCAC | GAGATTTCTG | TTCCACCGCC  | GCCTTCTATG  | 6180 |
| AAAGGTTGGG | CTTCGGAATC | GTTTTCCGGG | ACGCCGGCTG | GATGATCCTC  | CAGCGCGGGG  | 6240 |
| ATCTCATGCT | GGAGTCTTTC | GCCACCCTA  | GGGGGAGGCT | AACTGAAACA  | CGGAAGGAGA  | 6300 |
| CAATACCGGA | AGGAACCCGC | GCTATGACGG | CAATAAAAAG | ACAGAATAAA  | ACGCACGGTG  | 6360 |
| TTGGGTCGTT | TGTTTCATAA | CGCGGGGTT  | GGTCCCAGGG | CTGGCACTCT  | GTCGATACCC  | 6420 |
| CACCGAGACC | CCATTTGGGG | CAATACGCC  | GCGTTTCTTC | CTTTTCCCCA  | CCCCACCCCC  | 6480 |
| CAAGTTCGGG | TGAAGGCCCA | GGGCTCGCAG | CCAACGTTCG | GGCGGCAGG   | CCTGCCATAG  | 6540 |
| CCTCAGGTTA | CTCATATATA | CTTTAGATTG | ATTTAAAAC  | TCATTTTAA   | TTTAAAAGGA  | 6600 |
| TCTAGGTGAA | GATCCTTTTT | GATAATCTCA | TGACAAAAT  | CCCTTAACGT  | GAGTTTTCTG  | 6660 |
| TCCACTGAGC | GTCAGACCCC | GTAGAAAAGA | TCAAAGGATC | TTCTTGAGAT  | CCTTTTTTTC  | 6720 |
| TGCGGTAAT  | CTGCTGCTTG | CAAACAAAA  | AACCACCGCT | ACCAGCGGTG  | GTTTGTGTTG  | 6780 |
| CGGATCAAGA | GCTACCAACT | CTTTTCCGA  | AGGTAAC    | CTTCAGCAGA  | GCGCAGATAC  | 6840 |
| CAAATACTGT | CCTTCTAGTG | TAGCCGTAGT | TAGGCCACCA | CTTCAAGAAC  | TCTGTAGCAC  | 6900 |
| GCCCTACATA | CCTCGCTCTG | CTAATCCTGT | TACCAGTGGC | TGCTGCCAGT  | GGCGATAAGT  | 6960 |
| CGTGTCTTAC | CGGGTTGGAC | TCAAGACGAT | AGTTACC    | TAAGGCGCAG  | CGGTCCGGCT  | 7020 |
| GAACGGGGGG | TTCGTGCACA | CAGCCCAGCT | TGGAGCGAAC | GACCTACACC  | GAAGTGGAGT  | 7080 |
| ACCTACAGCG | TGAGCTATGA | GAAAGCGCCA | CGCTTCCCGA | AGGGAGAAA   | GCGGACAGGT  | 7140 |
| ATCCGGTAAG | CGGCAGGGTC | GGAACAGGAG | AGCGCACGAG | GGAGCTTCCA  | GGGGGAACG   | 7200 |
| CCTGGTATCT | TTATAGTCTT | GTCGGGTTTC | GCCACCTCTG | ACTTGAGCGT  | CGATTTTTGT  | 7260 |
| GATGCTCGTC | AGGGGGCGG  | AGCCTATGGA | AAAACGCCAG | CAACGCGGCC  | TTTTTACGGT  | 7320 |
| TCCTGGCCTT | TTGCTGGCCT | TTTGCTCACA | TGTTCTTTC  | TGCGTTATCC  | CCTGATTTCTG | 7380 |
| TGGATAACCG | TATTACCGCC | ATGCAT     |            |             |             | 7406 |



>pEYFP-Tet2 CD/CI (H1295Y/D1297A)

|             |             |             |            |             |            |      |
|-------------|-------------|-------------|------------|-------------|------------|------|
| TAGTTATTAA  | CTGTAATCAA  | TTACGGGGTC  | ATTAGTTCAT | AGCCCATATA  | TGGAGTTCGG | 60   |
| CGTTACATAA  | CTTACGGTAA  | ATGGCCCGCC  | TGGCTGACCG | CCCAACGACC  | CCCGCCCAT  | 120  |
| GACGTCAATA  | ATGACGTATG  | TTCCCATAGT  | AACGCCAATA | GGGACTTTCC  | ATTGACGTCA | 180  |
| ATGGGTGGAG  | TATTTACGGT  | AAACTGCCCA  | CTTGGCAGTA | CATCAAGTGT  | ATCATATGCC | 240  |
| AAGTACGCC   | CCTATTGACG  | TCAATGACGG  | TAAATGGCCC | GCCTGGCATT  | ATGCCCAGTA | 300  |
| CATGACCTTA  | TGGGACTTTC  | CTACTTGGCA  | GTACATCTAC | GTATTAGTCA  | TCGCTATTAC | 360  |
| CATGGTGATG  | CGGTTTTGGC  | AGTACATCAA  | TGGGCGTGGA | TAGCGGTTTG  | ACTCACGGGG | 420  |
| ATTTCCAAGT  | CTCCACCCCA  | TTGACGTCAA  | TGGGAGTTTG | TTTTGGCACC  | AAAATCAACG | 480  |
| GGACTTTCCA  | AAATGTCGTA  | ACAACCTCCG  | CCCATTGACG | CAAATGGGGG  | GTAGGCGTGT | 540  |
| ACGGTGGGAG  | GTCTATATAA  | GCAGAGCTGG  | TTTAGTGAAC | CGTCAGATCC  | GCTAGCGCTA | 600  |
| CCGGTCGCCA  | CCATGGTGAG  | CAAGGGCGAG  | GAGCTGTTCA | CCGGGGTGGT  | GCCCATCCTG | 660  |
| GTCCGAGCTG  | ACGGCGACGT  | AAACGGCCAC  | AAGTTCAGCG | TGTCCGGCGA  | GGGCGAGGGC | 720  |
| GATGCCACCT  | ACGGCAAGCT  | GACCCTGAAG  | TTTATCTGCA | CCACCGGCAA  | GCTGCCCGTG | 780  |
| CCCTGGCCCA  | CCCTCGGTAC  | CACCTTCGGC  | TACGGCCTGC | AGTGCTTCGC  | CCGTACCC   | 840  |
| GACCACATGA  | AGCAGCACGA  | CTTCTTCAAG  | TCCGCCATGC | CCGAAGGCTA  | CGTCCAGGAG | 900  |
| CGCACCATCT  | TCCTCAAGGA  | CGACGGCAAC  | TACAAGACCC | GCGCCGAGGT  | GAAATTCGAG | 960  |
| GGCGACACCC  | TGGTGAACCG  | CATCGAGCTG  | AAGGGCATFC | ACTTCAAGGA  | GGACGGCAAC | 1020 |
| ATCCTGGGGC  | ACAAGCTGGA  | GTACAACCTAC | AACAGCCACA | ACGTCTATAT  | CATGGCCGAC | 1080 |
| AAGCAGAAGA  | ACGGCATCAA  | GGTGAACCTC  | AAGATCCGCC | ACAACATCGA  | GGACGGCAGC | 1140 |
| GTGCAGCTCG  | CCGACCACTA  | CCAGCAGAAC  | ACCCCCATCG | GCGACGGCCC  | CGTGCTGCTG | 1200 |
| CCCGACAACC  | ACTACCTGAG  | CTACCAGTCC  | GCCCTGAGCA | AAGACCCCAA  | CGAGAAGCGC | 1260 |
| GATCACATGG  | TCCTGCTGGA  | GTTCGTGACC  | GCCGCCGGGA | TCACTCTCGG  | CATGGACGAG | 1320 |
| CTGTACAAGT  | CCGGACTCAG  | ATCTCGAGCT  | CAAGCTTCGA | ATTCTGCAGT  | CGACGGTACC | 1380 |
| GCGGGCCCGG  | CGCTTATGGA  | CTACAAAGAC  | GATGACGACA | AGGGATCCAC  | TAGTAACGGC | 1440 |
| CGCCAGTGTG  | CTGGAATTCC  | CCCTTTACAA  | AGTCAGAATG | GCAAAATGTA  | AGGATGCAAT | 1500 |
| CCAGACAAAG  | ATGAAGCTCC  | TTATTATACC  | CATCTGGGAG | CTGGTCTCGA  | TGTGGCAGCT | 1560 |
| ATTAGAACAC  | TCATGGAAGA  | AAGGTATGGA  | GAGAAGGGTA | AAGCTATTAG  | GATTGAAAAA | 1620 |
| GTCATATATA  | CTGGTAAAGA  | AGGCAAGAGC  | TCTCAGGGAT | GTCCTATTGC  | TAAATGGGTA | 1680 |
| TATCGGAGAT  | CGAGTGAGGA  | GGAGAAACTA  | CTGTGTTTGG | TACGAGTGGC  | ACCTAATCAC | 1740 |
| ACATGTGAGA  | CGGCGGTGAT  | GGTAATTGCC  | ATCATGTTGT | GGGACGGAAT  | CCCAAAGCTA | 1800 |
| AACCGCATCAG | AATCTTACTC  | AGAACTTACA  | GATATCTTGG | GCAAGTGTGG  | CATATGCACC | 1860 |
| CTCCGTCGCT  | TTTCTCAGAA  | TGAAACTAGA  | AACTGTTGTT | GTCAGGGTGA  | GAATCCAGAG | 1920 |
| ACCTGTGGTG  | CCTCCTTTTC  | TTTTGGTTGT  | TCTTGGAGCA | TGTACTATATA | TGGATGTAAG | 1980 |
| TTTGCCAGAA  | GCAAGAAACC  | AAGGAAATTT  | AGGCTACATG | GAGCTGAGCC  | AAAAGAGGAA | 2040 |
| GAGAGACTAG  | GTTCCTCATTT | GCAAAACCTG  | GCTACTGTCA | TTGCTCCAAT  | ATACAAGAAG | 2100 |
| CTTGACACCG  | ATGCATACAA  | TAATCAGGTT  | GAATTTGAAC | ACCAAGCCCC  | AGACTGCTGT | 2160 |
| TTGGGTCTGA  | AGGAAGGCCG  | GCCATTTCTCA | GGAGTCACTG | CATGTTTGGGA | CTTCTCTGCT | 2220 |
| CATTCCtACA  | GAGCCAGCA   | GAACATGCCA  | AATGGCAGTA | CAGTGGTGGT  | CACCCtCAAT | 2280 |
| AGAGAAGACA  | ATCGAGAAGT  | CGGAGCTAAG  | CCTGAGGATG | AGCAGTTCFA  | CGTGCTGCCT | 2340 |
| ATGTACATCA  | TCGCCCTTGA  | GGATGAGTTT  | GGGAGTACCG | AAGGCCAGGA  | GAAGAAGATA | 2400 |
| CGGATGGGGT  | CCATTGAGGT  | TCTGCAGTCA  | TTTCGGAGGA | GAAGGGTCAT  | AAGGATAGGA | 2460 |
| GAGTGCCTCA  | AGAGTTGCAA  | GAAGAAAGCG  | GAGCCCAAGA | AAGCCAAGAC  | CAAGAAAGCA | 2520 |
| GCTCGAAAGC  | GTTCCTCTCT  | GGAGAACTGC  | TCCAGTAGGA | CTGAGAAGGG  | AAAGTCTTCC | 2580 |
| TCACATACAA  | AGCTGATGGA  | AAATGCAAGC  | CATATGAAAC | AAATGACAGC  | ACAACCCGAG | 2640 |
| CTTTCGGGCC  | CGGTCACTCC  | GCAGCCACCA  | ACACTCCAGA | GGCACCTTCA  | GCAAGGGCAG | 2700 |
| AGGCCACAGC  | AGCCGCAGCC  | ACCTCAGCCG  | CAGCCCGAGA | CGACACCTCA  | GCCACAGCCA | 2760 |
| CAGCCACAGC  | ATATCATGCC  | CGGTAACCTC  | CAGTCTGTTG | GTTCTCATTG  | TTCTGGATCC | 2820 |
| ACCACTGTCT  | ACACGAGACA  | GCCTACTCCT  | CACAGTCCTT | ATCCCAGCTC  | AGCACACACC | 2880 |
| TCAGATATTT  | ATGGAGATAC  | CAACCATGTG  | AACTTTTACC | CCACTTTCAT  | TCATGCCTCG | 2940 |
| GGTTCATATT  | TGAATCCTTC  | TAATTACATG  | AACCCCTACC | TTGGGCTTTT  | GAATCAGAAT | 3000 |
| AACCAATATG  | CACCTTTTCC  | ATACAATGGG  | AGTGTGCCAG | TGGACAATGG  | TTCCCTTTTC | 3060 |
| TTAGGTTCTT  | ATTCCCCCA   | GGCTCAGTCC  | AGGGATCTAC | ATAGATATCC  | AAACCAGGAC | 3120 |
| CATCTCACCA  | ATCAGAACTT  | ACCACCCATC  | CACACCCCTC | ACCAACAGAC  | GTTTGGGGAC | 3180 |
| AGTCCCTCTA  | AGTACTTAAG  | TTATGGAAAC  | CAAAATATGC | AGAGAGATGC  | CTTCACTACT | 3240 |
| AACTCCACCC  | TAAACCCAAA  | TGTACACCAC  | CTAGCAACGT | TTTCTCTTTA  | CCCCACCC   | 3300 |
| AAGATGGATA  | GTCATTTTCAT | GGGAGCTGCC  | TACAGATCAC | CATACAGCCA  | CCCACACACT | 3360 |
| GACTACAAA   | CCAGTGAGCA  | TCATCTACCC  | TCTCACACGG | TCTACAGCTA  | CACGGCAGCA | 3420 |
| GCTTCGGGGA  | GCAGTTCAG   | CCACGCCCTC  | CACAACAAGG | AGAATGACAA  | CATAGCCAAT | 3480 |
| GGGCTCTCAA  | GAGTGCCTCC  | AGGGTTTAAAT | CATGATAGAA | CTGCTTCTGC  | CCAAGAACTA | 3540 |
| TTATACAGTC  | TGACTGGCAG  | CAGTCAGGAG  | AAGCAGCCTG | AGGTGTCAGG  | CCAGGATGCA | 3600 |
| GCTGCTGTGC  | AGGAAATGTA  | GTATTGGTCA  | GATAGTGAGC | ACAACCTTCA  | GGATCCTTGC | 3660 |
| ATTGGAGGGG  | TGGCTATAGC  | CCCAACTCAT  | GGGTCAATTC | TTATTGAGTG  | TGCAAAGTGT | 3720 |
| GAGGTTCATG  | CCACAACCAA  | AGTAAACGAT  | CCCGACCGGA | ATCACCCAC   | CAGGATCTCA | 3780 |
| CTTGTACTGT  | ATAGGCATAA  | GAATTTGTTT  | CTACCAAAAC | ATTGTTTGGC  | TCTCTGGGAA | 3840 |
| GCCAAAATGG  | CTGAAAAGGC  | CCGAAAAGAG  | GAAGAGTGCG | GAAAGAATGG  | ATCAGACCAC | 3900 |
| GTGTCTCAGA  | AAAATCATGG  | CAAACAGGAA  | AAGCGTGAGC | CCACAGGGCC  | ACAGGAACCC | 3960 |
| AGTTACCTGC  | GTTTCATCCA  | GTCTCTTGCT  | GAGAACACAG | GGTCTGTGAC  | TACGGATTCT | 4020 |
| ACCGTGACTA  | CATCACCATA  | TGCTTCTACT  | CAGGTCACAG | GGCCTTACAA  | CACATTTGTT | 4080 |
| AATAACTGAT  | CATAATCAGC  | CATACCACAT  | TTGTAGAGGT | TTTACTTGCT  | TTAAAAAAC  | 4140 |
| TCCCACACCT  | CCCCCTGAAC  | CTGAAAACATA | AAATGAATGC | AATTTGTTGT  | GTTAACTTGT | 4200 |
| TTATTGCAGC  | TTATAATGGT  | TACAAAATAA  | GCAATAGCAT | CACAAATTTT  | ACAAAATAAG | 4260 |
| CATTTTTTTC  | ACTGCATTCT  | AGTTGTGGTT  | TGTCCAAACT | CATCAATGTA  | TCTTAAAGCG | 4320 |
| TAAATTTGTA  | CGGTTAATAT  | TTTGTAAAA   | TTCCGCTTAA | ATTTTTGTTA  | AATCAGCTCA | 4380 |
| TTTTTTAACC  | AATAGGCCGA  | AATCCCTATA  | ATCCCTTATA | AATCAAAAGA  | ATAGACCGAG | 4440 |
| ATAGGGTTGA  | GTGTTGTTCC  | AGTTTGGAAC  | AAGAGTCCAC | TATTAAGAA   | CGTGGACTCC | 4500 |
| AACGTCAAAG  | GGCGAAAAAC  | CGTCTATCAG  | GGCGATGGCC | CACTACGTGA  | ACCATCACCC | 4560 |
| TAATCAAGTT  | TTTTGGGGTC  | GAGGTGCCGT  | AAAGCACTAA | ATCGGAACCC  | TAAAGGGAGC | 4620 |

|            |             |             |            |             |             |      |
|------------|-------------|-------------|------------|-------------|-------------|------|
| CCCCGATTTA | GAGCTTGACG  | GGAAAGCCG   | GCGAACGTGG | CGAGAAAGGA  | AGGGAAGAAA  | 4680 |
| GCGAAAGGAG | CGGGCGCTAG  | GGCGCTGGCA  | AGTGTAGCGG | TCACGCTGCG  | CGTAACCACC  | 4740 |
| ACACCCGCGG | CGCTTAATGC  | GCCGCTACAG  | GGCGCGTCAG | GTGGCACTTT  | TCGGGGAAAT  | 4800 |
| GTGCGCGGAA | CCCCTATTTG  | TTTATTTTTC  | TAAATACATT | CAAATATGTA  | TCCGCTCATG  | 4860 |
| AGACAATAAC | CCTGATAAAT  | GC'TTCAATA  | TATTGAAAA  | GGAAAGGTCC  | TGAGGCGGAA  | 4920 |
| AGAACCAGCT | GTGGAATGTG  | TGTCAGTTAG  | GGTGTGGAAA | GTCCCCAGGC  | TCCCCAGCAG  | 4980 |
| GCAGAAGTAT | GCAAAGCATG  | CATCTCAATT  | AGTCAGCAAC | CAGGTGTGGA  | AAGTCCCCAG  | 5040 |
| GCTCCCCAGC | AGGCAGAAGT  | ATGCAAAGCA  | TGCATCTCAA | TTAGTCAGCA  | ACCATAGTCC  | 5100 |
| CGCCCTAAC  | TCCGCCCATC  | CCGCCCTAA   | CTCCGCCCAG | TTCCGCCCAT  | TCTCCGCCCC  | 5160 |
| ATGGCTGACT | AATTTTTTTT  | ATTTATGCAG  | AGGCCGAGGC | CGCCTCGGCC  | TCTGAGCTAT  | 5220 |
| TCCAGAAGTA | GTGAGGAGGC  | TTTTTTGGAG  | GCCTAGGCTT | TTGCAAAGAT  | CGATCAAGAG  | 5280 |
| ACAGGATGAG | GATCGTTTTC  | CATGATTGAA  | CAAGATGGAT | TGCACGCAGG  | TTCTCCGGCC  | 5340 |
| GCTTGGGTGG | AGAGGCTATT  | CGGCTATGAC  | TGGGCACAAC | AGACAATCGG  | CTGCTCTGAT  | 5400 |
| TCCCGCGTGT | TCCGGCTGTC  | AGCGCAGGGG  | CGCCCGGTTT | TTTTTTGTCAA | GACCGACCTG  | 5460 |
| TCCGGTGCCT | TGAATGAACT  | GCAAGACGAG  | GCAGCGCGGC | TATCGTGGCT  | GGCCACGACG  | 5520 |
| GGGTTTCCCT | GCGCAGCTGT  | GCTCGACGTT  | GTCACTGAAG | CGGGAAGGGA  | CTGGCTGCTA  | 5580 |
| TTGGGCGAAG | TGCCGGGGCA  | GGATCTCCTG  | TCATCTCACC | TTGCTCCTGC  | CGAGAAAGTA  | 5640 |
| TCCATCATGG | CTGATGCAAT  | GCGCGGGCTG  | CATACGCTTG | ATCCGGCTAC  | CTGCCCATTC  | 5700 |
| GACCACCAAG | CGAAAACATCG | CATCGAGCGA  | GCACGTACTC | GGATGGAAGC  | CGGTCTTGTC  | 5760 |
| GATCAGGATG | ATCTGGACGA  | AGAGCATCAG  | GGCTCGCGC  | CAGCCGAACT  | GTTCCGCCAGG | 5820 |
| CTCAAGGCGA | GCATGCCCGA  | CGGCGAGGAT  | CTCGTCGTTA | CCCATGGCGA  | TGCCTGCTTG  | 5880 |
| CCGAATATCA | TGGTGGAAAA  | TGGCCGCTTT  | TCTGGATTCA | TCGACTGTGG  | CCGGCTGGGT  | 5940 |
| GTGGCGGACC | GCTATCAGGA  | CATAGCGTTG  | GCTACCCGTG | ATATTGCTGA  | AGAGCTTGGC  | 6000 |
| GGCGAATGGG | CTGACCGCTT  | CCTCGTGCTT  | TACGGTATCG | CCGCTCCCGA  | TTCGCAGCGC  | 6060 |
| ATCGCCTTCT | ATCGCCTTCT  | TGACGAGTTC  | TTCTGAGCGG | GACTCTGGGG  | TTCGAAATGA  | 6120 |
| CCGACCAAGC | GACGCCAAC   | CTGCCATCAC  | GAGATTTGCA | TTCCACCGCC  | GCCTTCTATG  | 6180 |
| AAAGGTTGGG | CTTCGGAATC  | GTTTTCCGGG  | ACGCCGGCTG | GATGATCCTC  | CAGCGCGGGG  | 6240 |
| ATCTCATGCT | GGAGTTCTTC  | GCCCACCCTA  | GGGGGAGGCT | AACTGAAACA  | CGGAAGGAGA  | 6300 |
| CAATACCGGA | AGGAACCCGC  | GCTATGACGG  | CAATAAAAAG | ACAGAATAAA  | ACGCACGGTG  | 6360 |
| TTGGGTGCTT | TGTTCATAAA  | CGCGGGGTTT  | GGTCCCAGGG | CTGGCACTCT  | GTCGATACCC  | 6420 |
| CACCGAGACC | CCATTGGGGC  | CAATACGCCC  | GCGTTTCTTC | CTTTTCCCCA  | CCCCACCCCC  | 6480 |
| CAAGTTCGGG | TGAAGGCCCA  | GGGCTCGCAG  | CCAACGTCGG | GGCGGCAGGC  | CCTGCCATAG  | 6540 |
| CCTCAGGTTA | CTCATATATA  | CTTTAGATG   | ATTTAAAAT  | TCATTTTAA   | TTTAAAAGGA  | 6600 |
| TCTAGGTGAA | GATCCTTTTT  | GATAATCTCA  | TGACCAAAAT | CCCTTAACGT  | GAGTTTTCTGT | 6660 |
| TCCACTGAGC | GTCAGACCCC  | GTAGAAAAGA  | TCAAAGGATC | TTCTTGAGAT  | CCTTTTTTTC  | 6720 |
| TGCGCGTAAT | CTGCTGCTTG  | CAAACAAAAA  | AACCACCGTG | ACCAGCGGTG  | GTTTGTGTTG  | 6780 |
| CGGATCAAGA | GCTACCAACT  | CTTTTCCGA   | AGGTAACCTG | CTTCAGCAGA  | GCGCAGATAC  | 6840 |
| CAAATACTGT | CCTTCTAGTG  | TAGCCGTAGT  | TAGGCCACCA | CTTCAAGAAC  | TCTGTAGCAC  | 6900 |
| CGCTACATA  | CCTCGCTCTG  | CTAATCCTGT  | TACCAGTGGC | TGCTGCAGT   | GGCGATAAGT  | 6960 |
| CGTGTCTTAC | CGGGTTGGAC  | TCAAGACGAT  | AGTTACCGGA | TAAGGCGCAG  | CGGTCCGGCT  | 7020 |
| GAACGGGGGG | TTCTGTGCACA | CAGCCCAGCT  | TGGAGCGAAC | GACCTACACC  | GAACGAGAT   | 7080 |
| ACCTACAGCG | TGAGCTATGA  | GAAAGCGCCA  | CGCTTCCCAG | AGGGAGAAAG  | GCGGACAGGT  | 7140 |
| ATCCGGTAAG | CGGCAGGGTC  | GGAAACAGGAG | AGCGCACGAG | GGAGCTTCCA  | GGGGGAAACG  | 7200 |
| CCTGGTATCT | TTATAGTCTT  | GTCGGGTTTC  | GCCACCTCTG | ACTTGAGCGT  | CGATTTTTGT  | 7260 |
| GATGCTCGTC | AGGGGGGCGG  | AGCCTATGGA  | AAAACGCCAG | CAACGCGGCC  | TTTTTACGGT  | 7320 |
| TCCTGCCCTT | TTGCTGGCCT  | TTTGCTCACA  | TGTTCTTTCC | TGCGTTATCC  | CCTGATCTGT  | 7380 |
| TGGATAACCG | TATTACCGCC  | ATGCAT      |            |             |             | 7406 |

## Supplemental Table S7

### Substrate used in Figures 1A and 2A

|            |            |            |             |             |             |      |
|------------|------------|------------|-------------|-------------|-------------|------|
| GGTACCCGGG | GATCCTCTAG | AGTCGACCTG | CAGGCATGCA  | AGCTTGGCGT  | AATCATGGTC  | 60   |
| ATAGCTGTTT | CCTGTGTGAA | ATTGTTATCC | GTCACAATT   | CCACACAACA  | TACGAGCCGG  | 120  |
| AAGCATAAAG | TGTAAAGCCT | GGGGTGCCTA | ATGAGTGAGC  | TAACACACAT  | TAATTGCGTT  | 180  |
| GCGTCACTG  | CCCGCTTTC  | AGTCGGGAAA | CCTGTCTGTC  | CAGCTGCATT  | AATGAATCGG  | 240  |
| CCAACGCGCG | GGGAGAGGCG | GTTTGCCTAT | TGGGCGCTCT  | TCCGCTTCTT  | CGCTCACTGA  | 300  |
| CTCGCTGCGC | TCGGTCTGTC | GGCTGCGGCG | AGCGGTATCA  | GCTCACTCAA  | AGGCGGTAAT  | 360  |
| ACGGTTATCC | ACAGAATCAG | GGGATAACGC | AGGAAAGAAC  | ATGTGAGCAA  | AAGGCCAGCA  | 420  |
| AAAGGCCAGG | AACCGTAAAA | AGGCCGCGTT | GCTGGCGTTT  | TTCCATAGGC  | TCCGCCCCCC  | 480  |
| TGACGAGCAT | CACAAAAATC | GACGCTCAAG | TCAGAGGTGG  | CGAAACCCGA  | CAGGACTATA  | 540  |
| AAGATACCG  | GGTTTCCCCC | TGGAAGCTCC | CTCGTGCCT   | CTCCTGTTC   | GACCCCTGCCG | 600  |
| CTTACCGGAT | ACCTGTCCGC | CTTCTCCCT  | TCGGGAAGCG  | TGGCGCTTTC  | TCATAGCTCA  | 660  |
| CGTGTAGGAT | ATCTCAGTTC | GGTGTAGGTC | GTTCGCTCCA  | AGCTGGGCTG  | TGTGCACGAA  | 720  |
| CCCCCGTTC  | AGCCCGACCG | CTGCGCCTTA | TCCGGTAACT  | ATCGTCTTGA  | GTCCAACCCG  | 780  |
| GTAAGACACG | ACTTATCGCC | ACTGGCAGCA | GCCACTGGTA  | ACAGGATTAG  | CAGAGCGAGG  | 840  |
| TATGTAGGCG | GTGCTACAGA | GTTCTTGAAG | TGGTGGCCTA  | ACTACGGCTA  | CACTAGAAGA  | 900  |
| ACAGTATTTG | GTATCTGCGC | TCTGCTGAAG | CCAGTTACCT  | TCGGAAAAAG  | AGTTGGTAGC  | 960  |
| TCTTGATCCG | GCAACAAAC  | CACCGCTGGT | AGCGGTGGTT  | TTTTTGTTTG  | CAAGCAGCAG  | 1020 |
| ATTACGCGCA | GAAAAAAGG  | ATCTCAAGAA | GATCCTTTGA  | TCTTTTCTAC  | GGGGTCTGAG  | 1080 |
| GCTCAGTGA  | ACGAAAACTC | ACGTAAAGG  | ATTTTGGTCA  | TGAGATTATC  | AAAAAGGATC  | 1140 |
| TTCACCTAGA | TCCTTTTAAA | TTAAAAATGA | AGTTTTAAAT  | CAATCTAAAG  | TATATATGAG  | 1200 |
| TAAACTTGGT | CTGACAGTTA | CCAATGCTTA | ATCAGTGAGG  | CACCTATCTC  | AGCGATCTGT  | 1260 |
| CTATTTCTGT | CATCCATAGT | TGCCTGACTC | CCCGTCTGCT  | AGATAACTAC  | GATACGGGAG  | 1320 |
| TGCCTTACCA | ATCCGCCAG  | TGCTGCAATG | ATACCCGAG   | ACCCACGCTC  | ACCGGCTCCA  | 1380 |
| GATTTATCAG | CAATAAACCA | GCCAGCCGGA | AGGGCCGAGC  | GCAGAAGTGG  | TCCTGCAACT  | 1440 |
| TTATCCGCTT | CCATCCAGTC | TATTAATTGT | TGCCGGGAAG  | CTAGAGTAAAG | TAGTTCGCCA  | 1500 |
| GTTAATAGTT | TGCCCAACGT | TGTTGCCATT | GCTACAGGCA  | TCGTGGTGTG  | ACGCTCGTCG  | 1560 |
| TTTGGTATGG | CTTCATTCAG | CTCCGGTTCC | CAACGATCAA  | GGCGAGTTAC  | ATGATCCCCC  | 1620 |
| ATGTTGTGCA | AAAAGCGGT  | TAGTCCCTTC | GGTCCCTCGA  | TCGTTGTFCAG | AAGTAAGTTG  | 1680 |
| GCCGAGTGT  | TATCACTCAT | GGTTATGGCA | GCACTGCATA  | ATTCTCTTAC  | TGTCATGCCA  | 1740 |
| TCCGTAAGAT | GCTTTTCTGT | GACTGGTGAG | TACTCAACCA  | AGTCATTCTG  | AGAATAGTGT  | 1800 |
| ATGCGGCGAC | CGAGTTGCTC | TTGCCCGGCG | TCAATACGGG  | ATAATACCGC  | GCCACATAGC  | 1860 |
| AGAAGTTTAA | AAGTGCTCAT | CATTGGAAAA | CGTTCTTCGG  | GGCGAAAACT  | CTCAAGGATC  | 1920 |
| TTACCGCTGT | TGAGATCCAG | TTCGATGTAA | CCCCTCTGTC  | CACCCAACTG  | ATCTTCAGCA  | 1980 |
| TCTTTTACTT | TCACCAGCGT | TTCTGGGTGA | GCAAAAAACAG | GAAGGCAAAA  | TGCCGCAAAA  | 2040 |
| AAGGAATAAA | GGGCGACACG | GAAATGTTGA | ATACTCATA   | TCTTCTTTTT  | TCAATATTAT  | 2100 |
| TGAAGCATTT | ATCAGGGTTA | TTGTCTCATG | AGCGGATACA  | TATTTGAATG  | TATTTAGAAA  | 2160 |
| AATAAACAAA | TAGGGGTTC  | GCGCACATTT | CCCCGAAAAG  | TGCCACCTGA  | CGTCTAAGAA  | 2220 |
| ACCATATTA  | TCATGACATT | AACCTATAAA | AATAGGCGTA  | TCACGAGGCC  | CTTTCGTCTC  | 2280 |
| GCGCGTTTCG | GTGATGACGG | TGAAAACCTC | TGACACATGC  | AGCTCCCGGA  | GACGGTCACA  | 2340 |
| GCTTGTCTGT | AAGCGGATGC | CGGGAGCAGA | CAAGCCCGTC  | AGGGCGCGTC  | AGCGGGTGTT  | 2400 |
| GCGGGGTGTC | GGGGCTGGCT | TAACATGCG  | GCATCAGAGC  | AGATTGTA    | GAGAGTGCAC  | 2460 |
| CATATGCGGT | GTGAAATACC | GCACAGATGC | GTAAGGAGAA  | AATACCGCAT  | CAGGGCCCAT  | 2520 |
| TCGCCATTCA | GGCTGCGCAA | CTGTTGGGAA | GGGCGATCGG  | TGCGGGCCTC  | TTCGCTATTA  | 2580 |
| CGCCAGCTGG | CGAAAGGGGG | ATGTGCTGCA | AGGCGATTAA  | GTGGGTAAAC  | GCCAGGGTTT  | 2640 |
| TCCCAGTCAC | GACGTTGTAA | AACGACGGCC | AGTGAATTCG  | AGCTCGGTAC  | CCGGGGATCC  | 2700 |
| TCTAGAGT   | -- Biotin  |            |             |             |             | 2708 |
